# Supplementary material for: Mitochondrial-targeted antioxidant attenuates preeclampsia-like phenotypes induced by syncytiotrophoblast-specific Gαq signaling
Source: PubMed Central journal article supplement — Sci Adv. 2023 Dec 1;9(48):eadg8118. doi: 10.1126/sciadv.adg8118 (PMC10691776; doi:10.1126/sciadv.adg8118), 2023-12-01
Supplement: sciadv.adg8118_sm.pdf [file sciadv.adg8118_sm.pdf]

Supplementary Materials for  
**Mitochondrial-targeted antioxidant attenuates preeclampsia-like phenotypes  
induced by syncytiotrophoblast-specific Gαq signaling**

Megan A. Opichka *et al.*

Corresponding author: Justin L. Grobe, [jgrobe@mcw.edu](mailto:jgrobe@mcw.edu); Jennifer J. McIntosh, [jmcintosh@mcw.edu](mailto:jmcintosh@mcw.edu)

*Sci. Adv.* **9**, eadg8118 (2023)  
DOI: 10.1126/sciadv.adg8118

**This PDF file includes:**

Fig. S1 to S26  
Tables S1 to S7

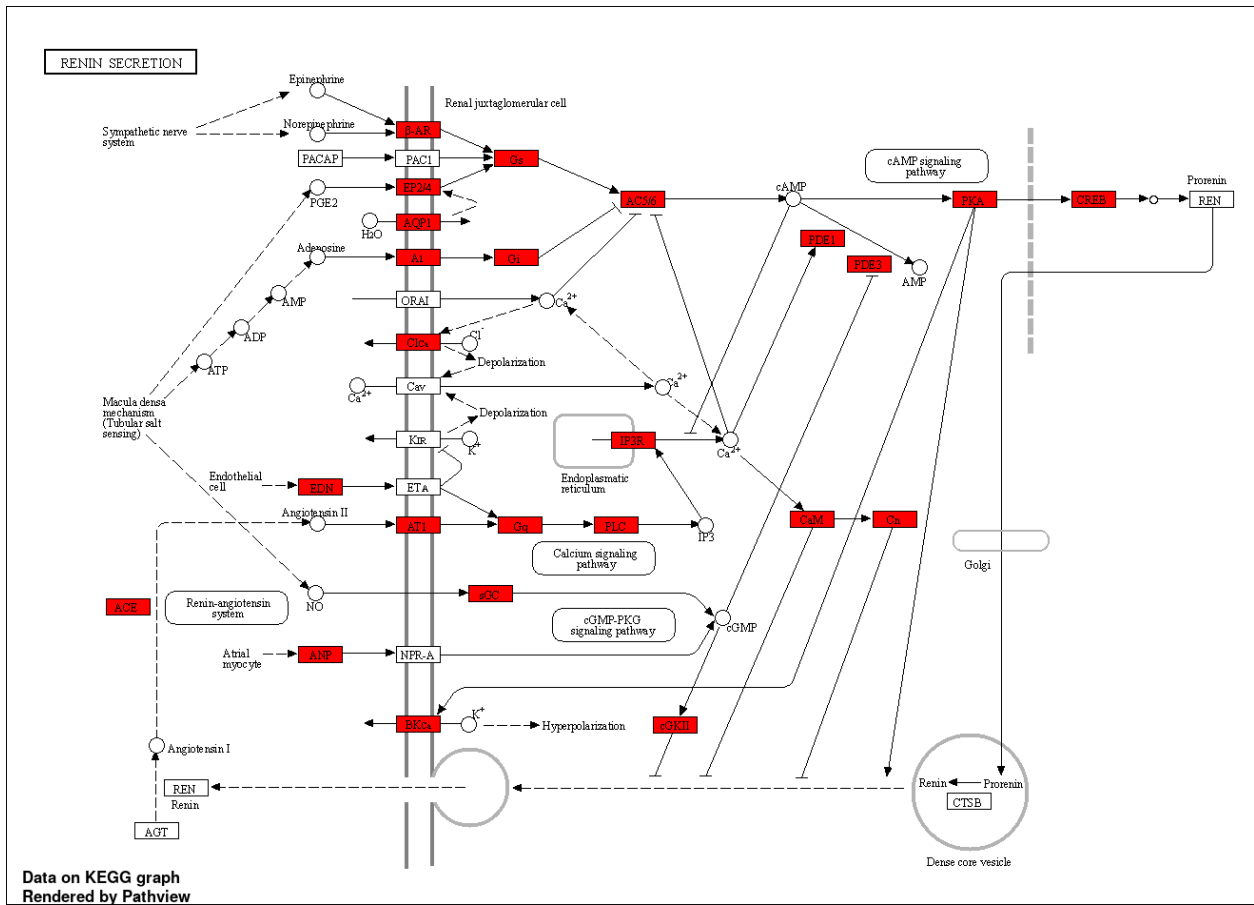

**Fig. S1.** KEGG pathway analysis for renin secretion within a human placental microarray dataset (GSE75010) using ShinyGO 0.77. Red indicates enrichment within the differentially expressed gene set in preterm preeclampsia (n=49) vs. preterm control (n=35).

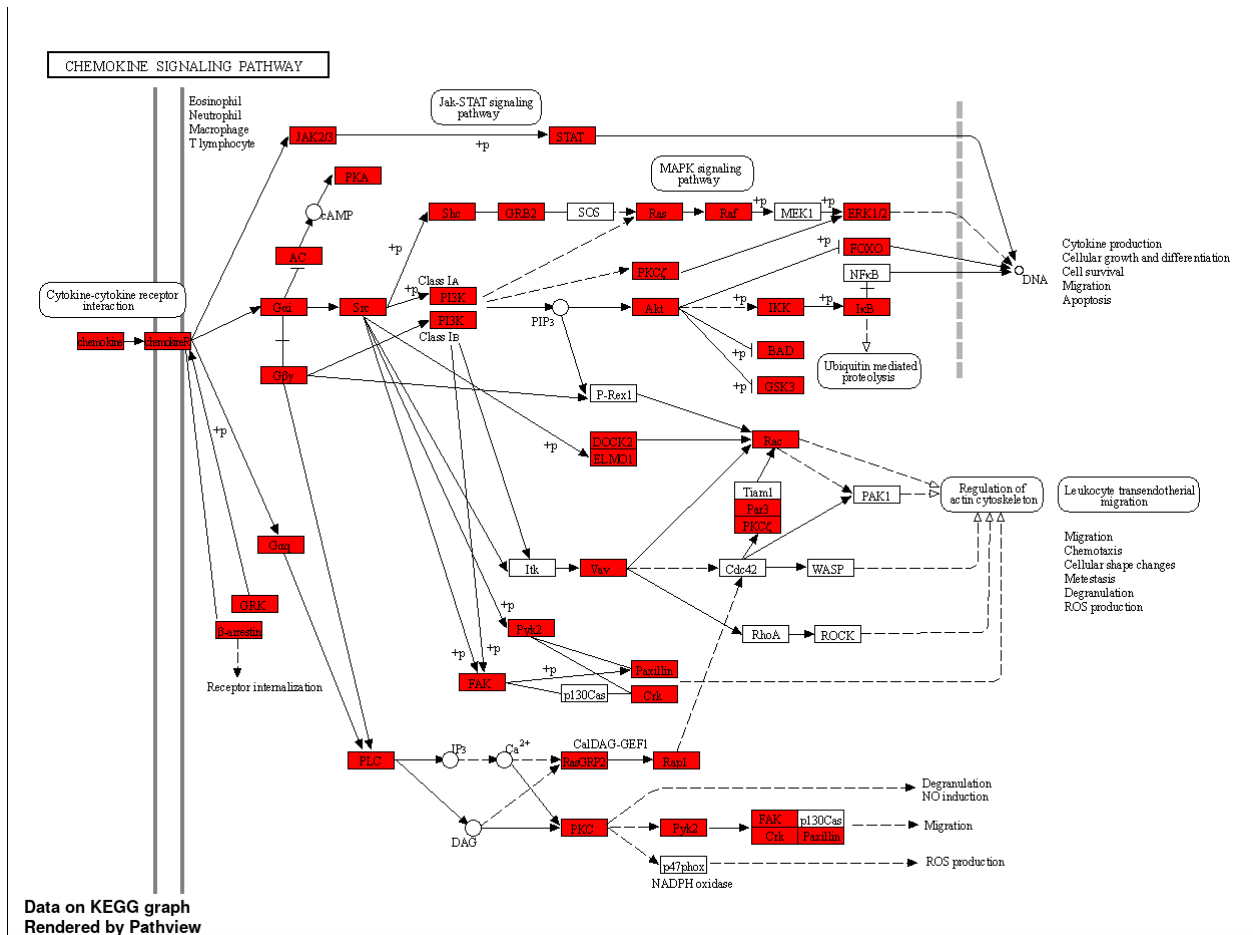

**Fig. S2.** KEGG pathway analysis for chemokine signaling within a human placental microarray dataset (GSE75010) using ShinyGO 0.77. Red indicates enrichment within the differentially expressed gene set in preterm preeclampsia (n=49) vs. preterm control (n=35).

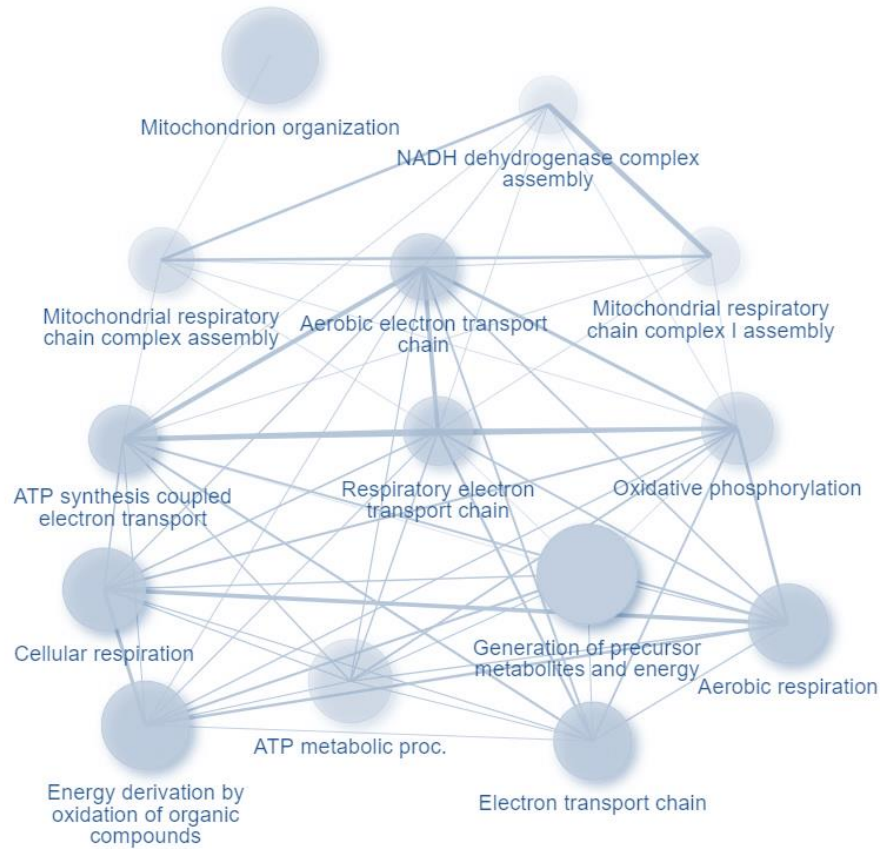

**Fig. S3.**  
**Network analysis among downregulated genes during preterm preeclampsia (n=49) vs. preterm control (n=35) within a human placental microarray dataset (GSE75010).**

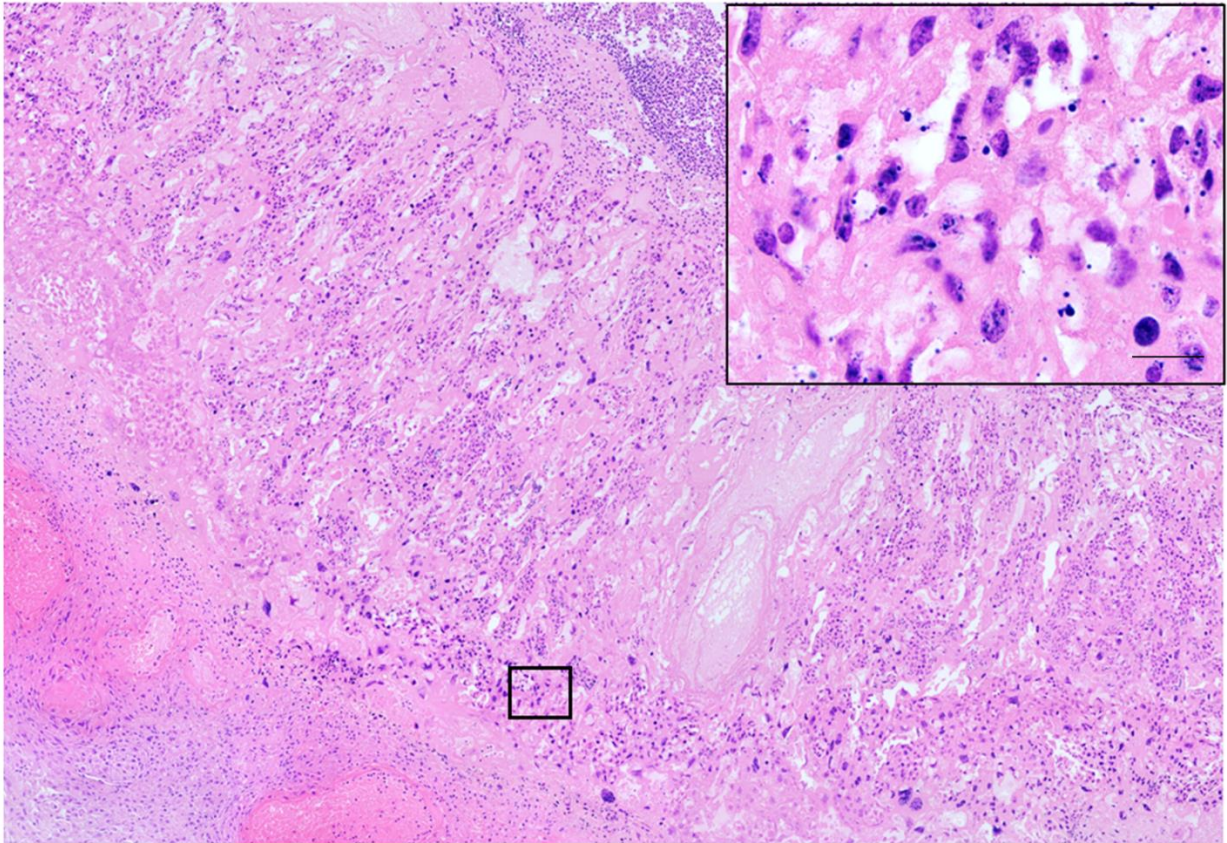

**Fig S4.**

**Hematoxylin and eosin-stained placenta tissue from a CNO-injected *hM3Dq*<sup>F/F</sup> dam x *Actb-Cre*<sup>+/+</sup> sire pregnancy at GD 14.5. Scale bar: 25  $\mu$ m.**

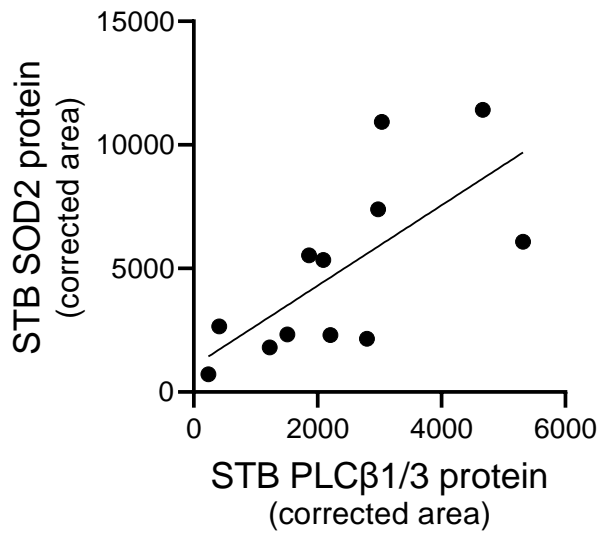

**Fig. S5.**

**Correlation between PLCβ1/PLCβ3 and SOD2 protein expression in laser capture microdissected human syncytiotrophoblast cells; STB, syncytiotrophoblast.**

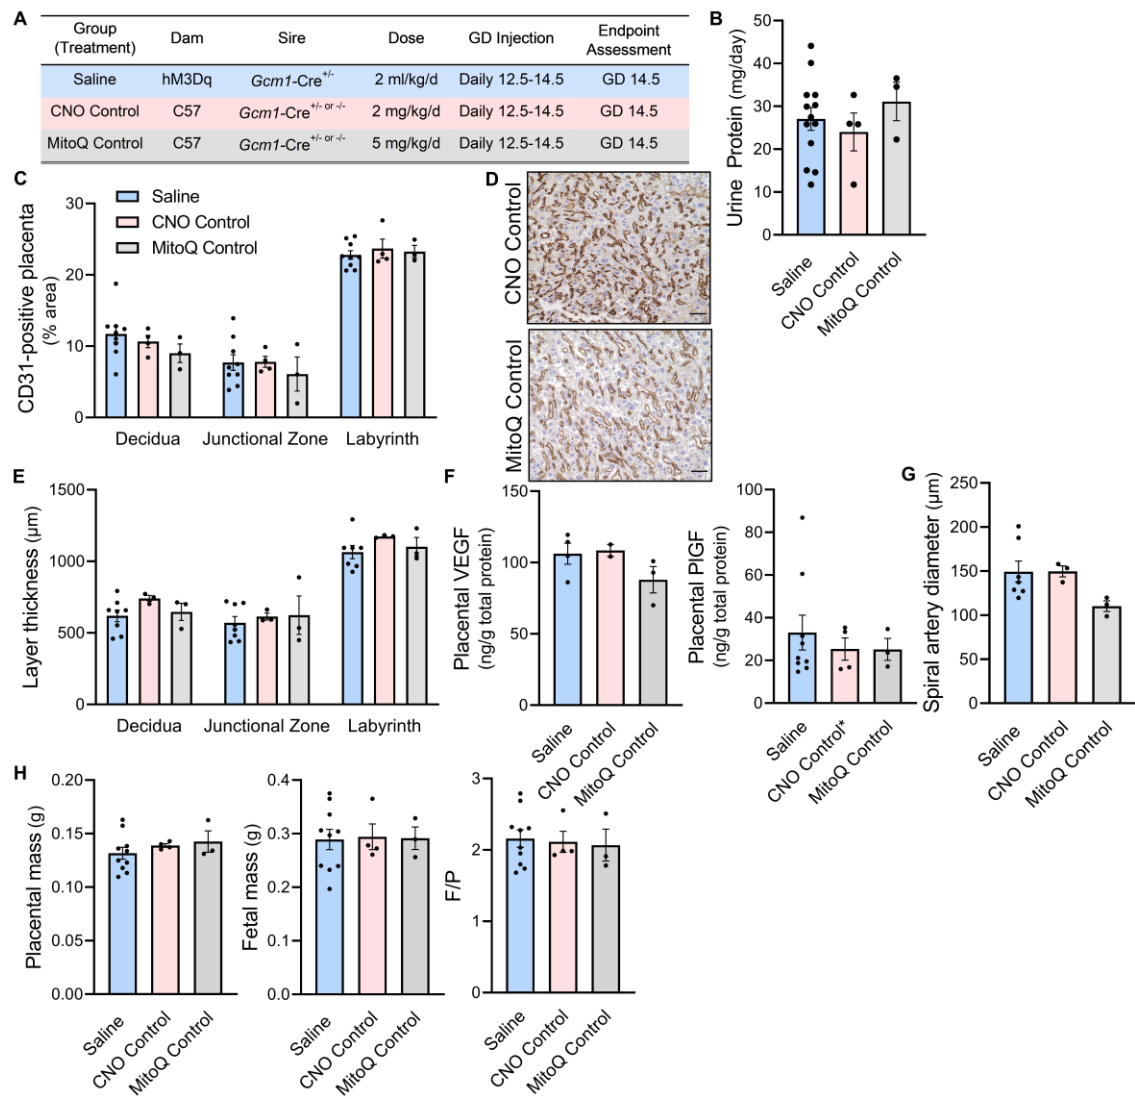

**Fig. S6.**

**Independent effects of CNO and MitoQ administration during pregnancy at GD 14.5. (A) Details of control pregnancy cohorts. (B) 24-hour maternal urine protein excretion. (C) Total vascularization within each primary layer of the mouse placenta, evaluated by CD31 immunohistochemistry. (D) Representative labyrinth image of DAB immunostain for CD31. Scale bars: 50µm. (E) Thickness of each placental layer. (F) Placental VEGF and PlGF protein content. (G) Average luminal diameter of decidual spiral arteries. (H) Placental mass, fetal mass, and fetal mass/placental mass.**

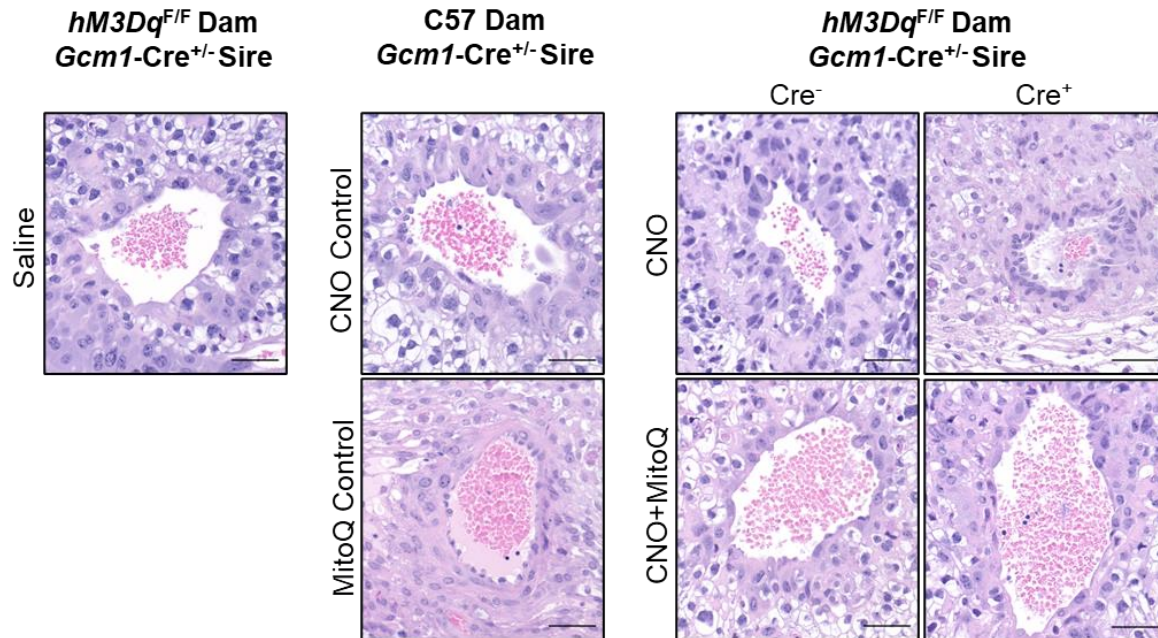

**Fig. S7.**  
**Representative spiral artery images within hematoxylin and eosin-stained placenta at GD 14.5. Scale bars: 50  $\mu$ m.**



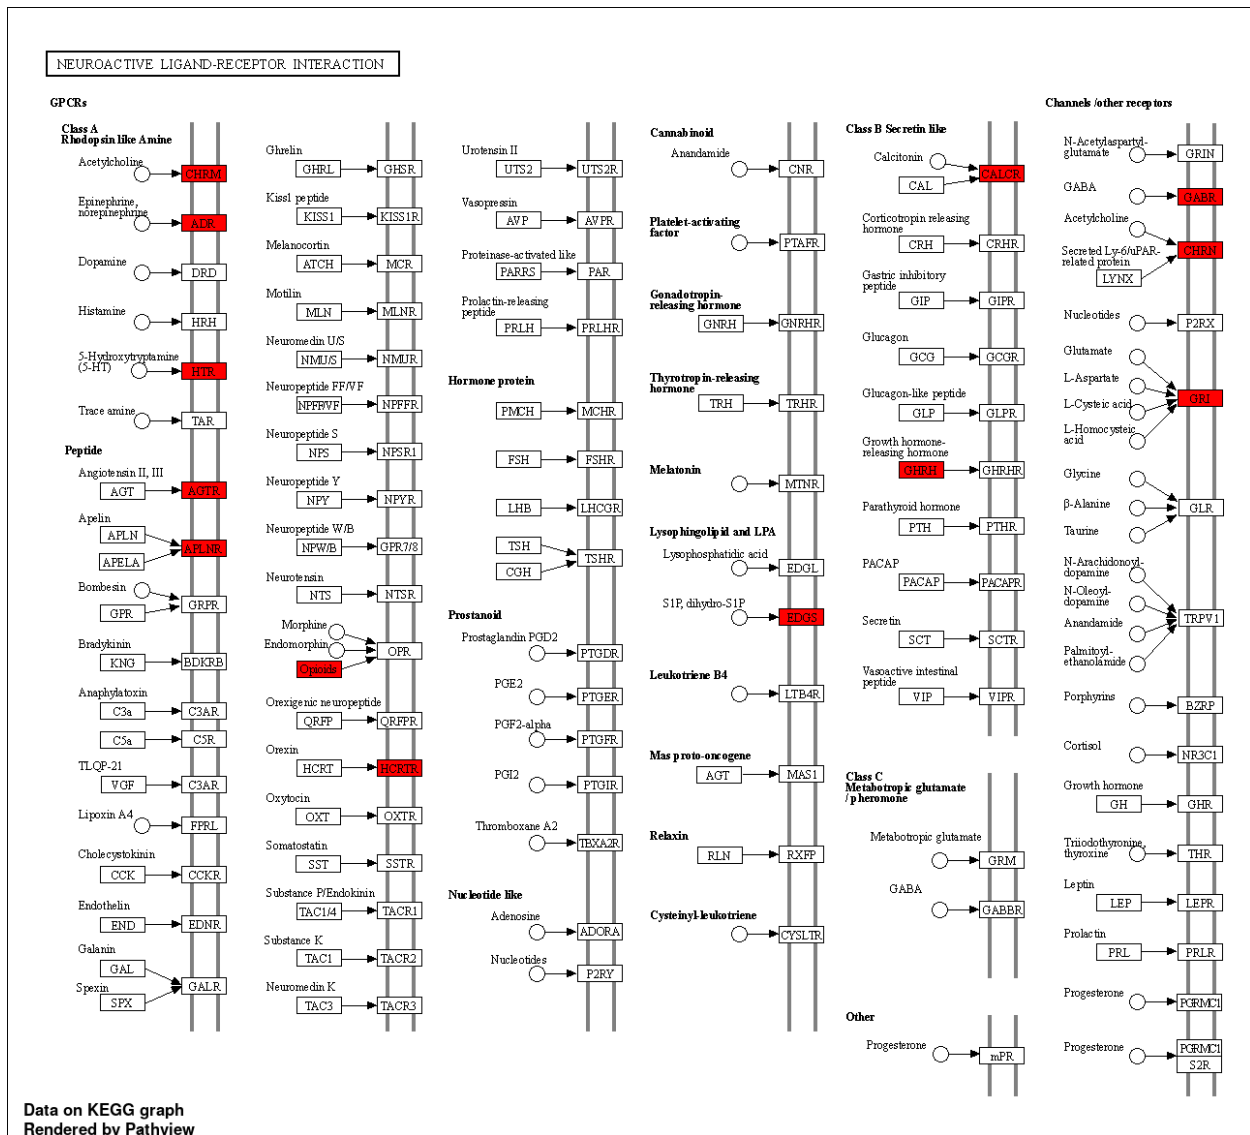

**Fig. S8.** KEGG pathway analysis for neuroactive ligand-receptor interactions (ShinyGO 0.77) within the upregulated gene set in CNO Cre<sup>+</sup> placenta vs. controls (Saline, CNO Cre<sup>-</sup>) determined by bulk RNA-sequencing (n=6 per group, *hM3Dq*<sup>F/F</sup> dam x *Gcm1-Cre*<sup>+/-</sup> sire, GD 14.5). Red indicates enrichment.

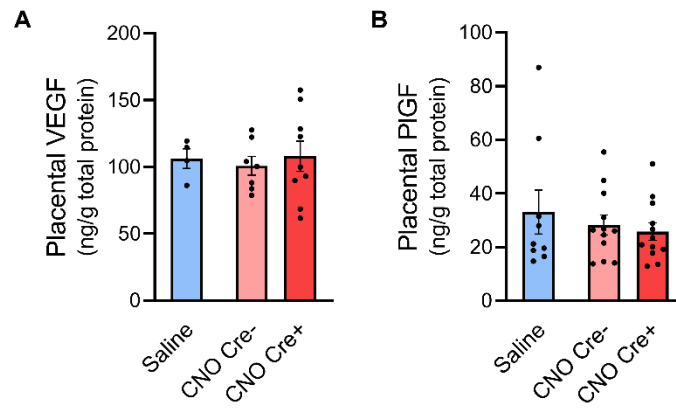

**Fig. S9.**

Labyrinth-enriched placental expression of angiogenic proteins in *hM3Dq<sup>F/F</sup>* dam x *Gcm1-Cre<sup>+/-</sup>* sire pregnancies at GD 14.5.

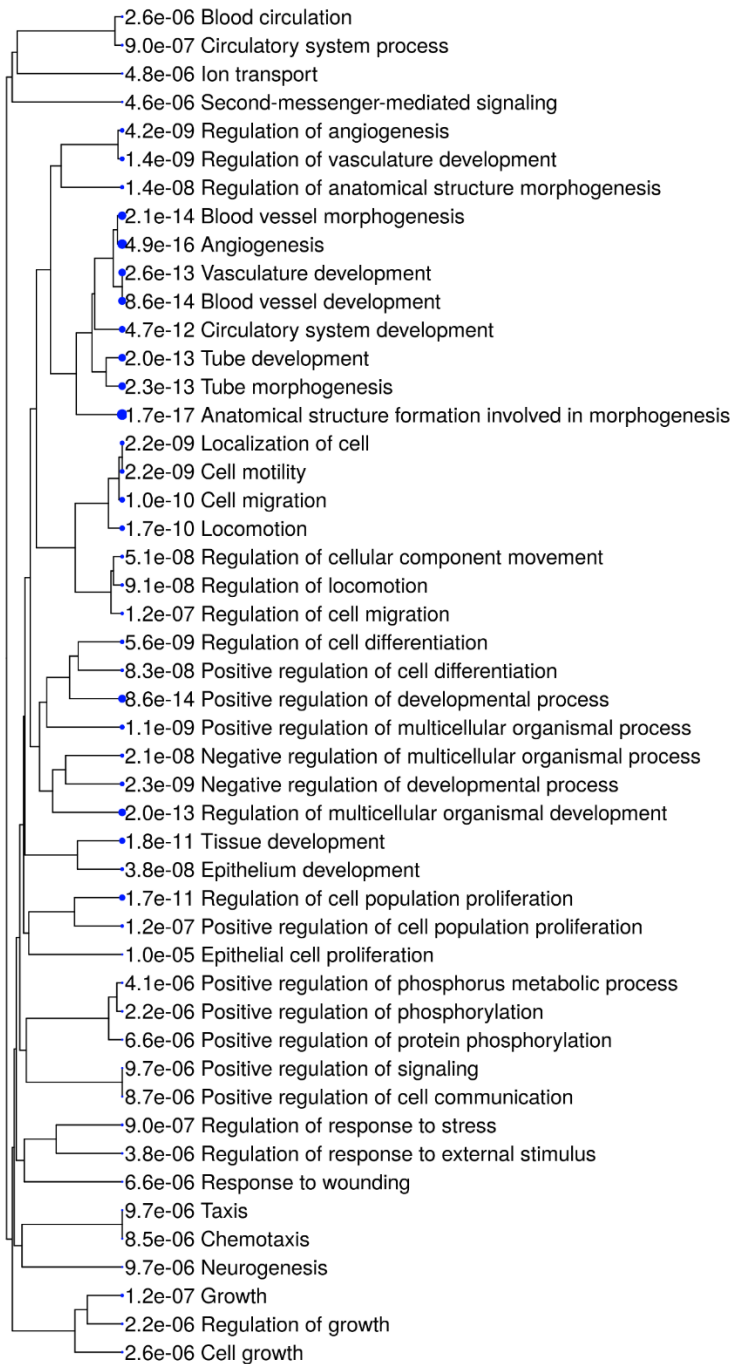

**Fig. S10.**

**Linkage among enriched gene ontology biological processes terms (Shiny GO 0.77) within the differentially expressed gene set of CNO Cre<sup>+</sup> placentas compared to controls (Saline, CNO Cre<sup>-</sup>) determined by bulk RNA-sequencing sequencing (n=6 per group, hM3Dq<sup>F/F</sup> dam x *Gcm1*-Cre<sup>+/-</sup> sire, GD 14.5).**

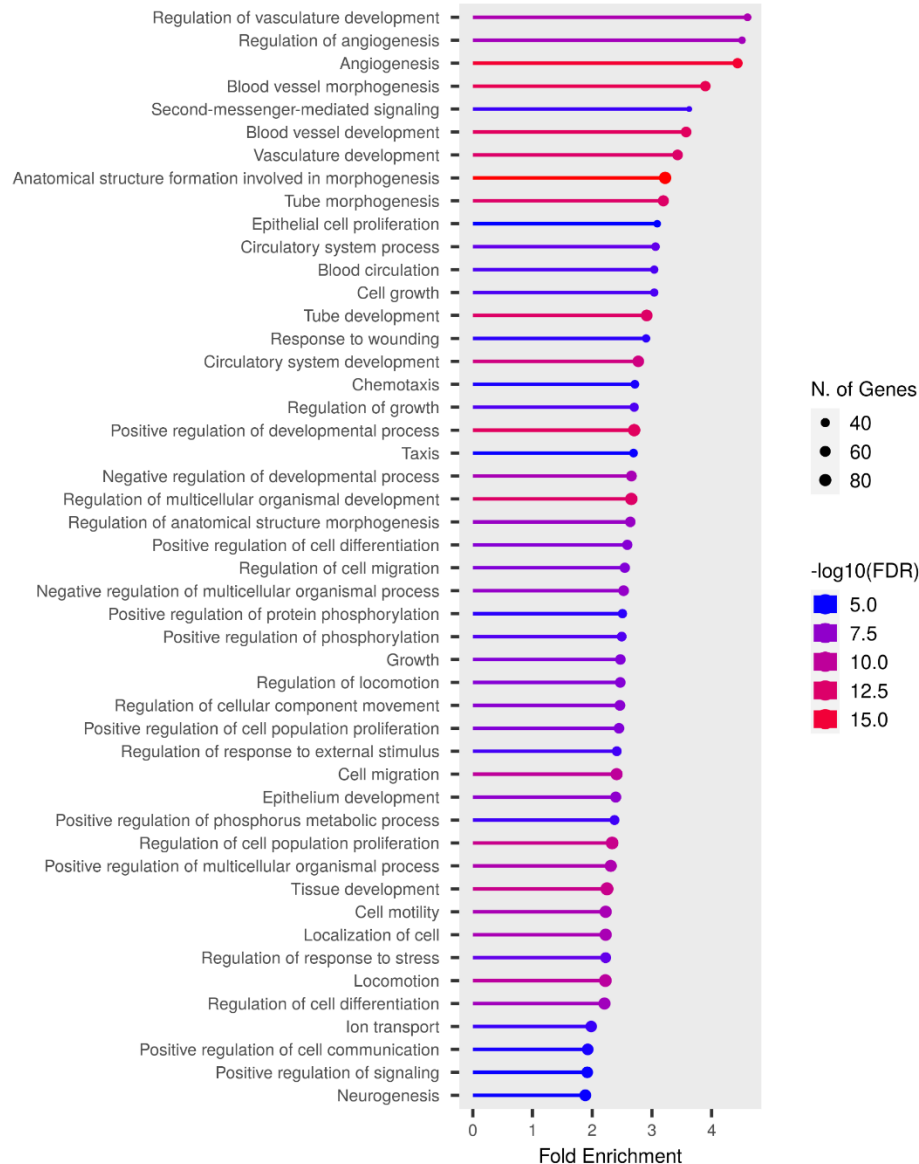

**Fig. S11.**

**Enriched gene ontology biological processes terms (Shiny GO 0.77) within the differentially expressed gene set of CNO Cre<sup>+</sup> placentas compared to controls (Saline, CNO Cre<sup>-</sup>) determined by bulk RNA-sequencing sequencing (n=6 per group, hM3Dq<sup>F/F</sup> dam x *Gcm1*-Cre<sup>+/-</sup> sire, GD 14.5).**

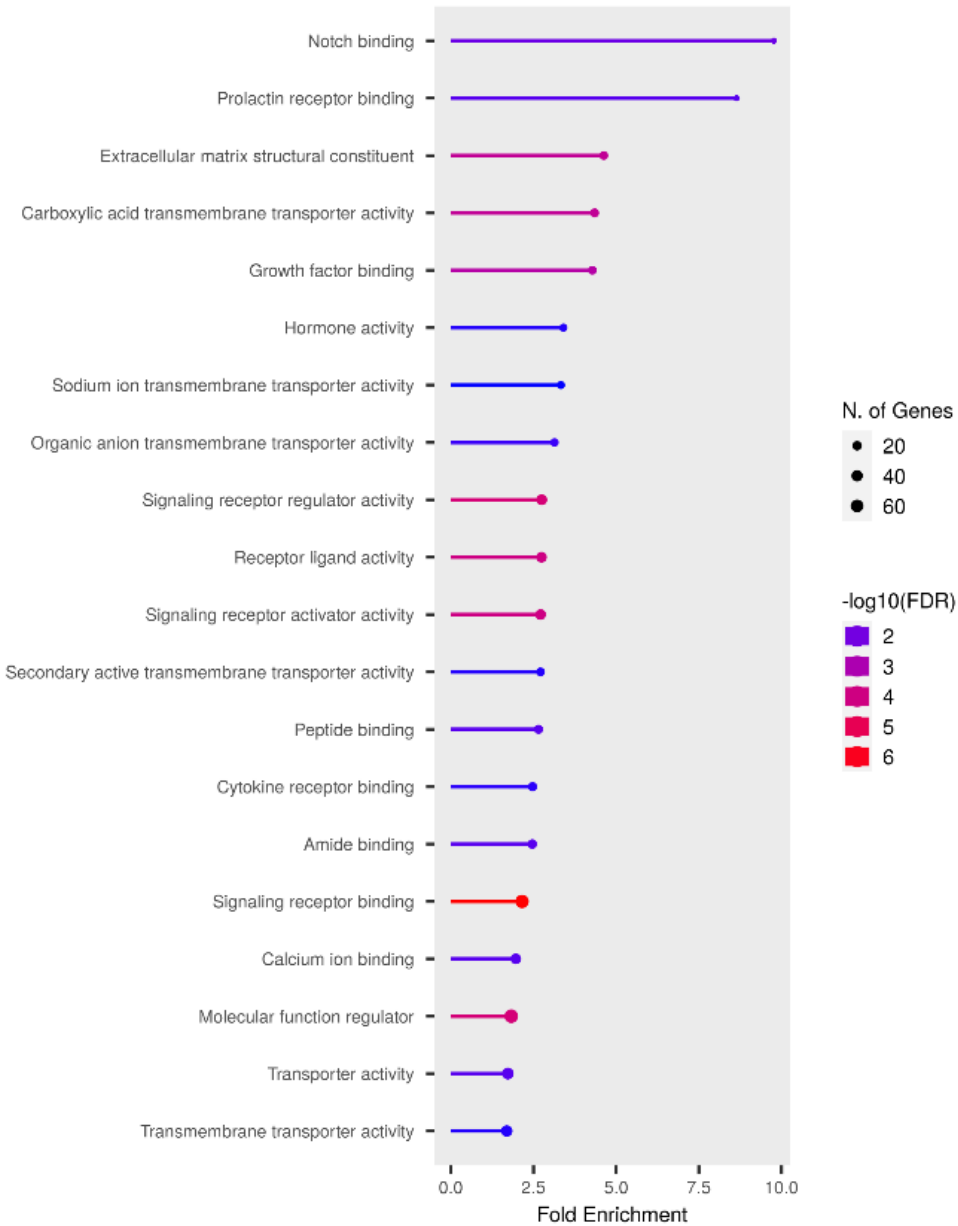

**Fig. S12.**

**Enriched gene ontology molecular function terms (Shiny GO 0.77) within the differentially expressed gene set of CNO Cre<sup>+</sup> placentas compared to controls (Saline, CNO Cre<sup>-</sup>) determined by bulk RNA-sequencing sequencing (n=6 per group, hM3Dq<sup>F/F</sup> dam x *Gcm1*-Cre<sup>+/-</sup> sire, GD 14.5).**

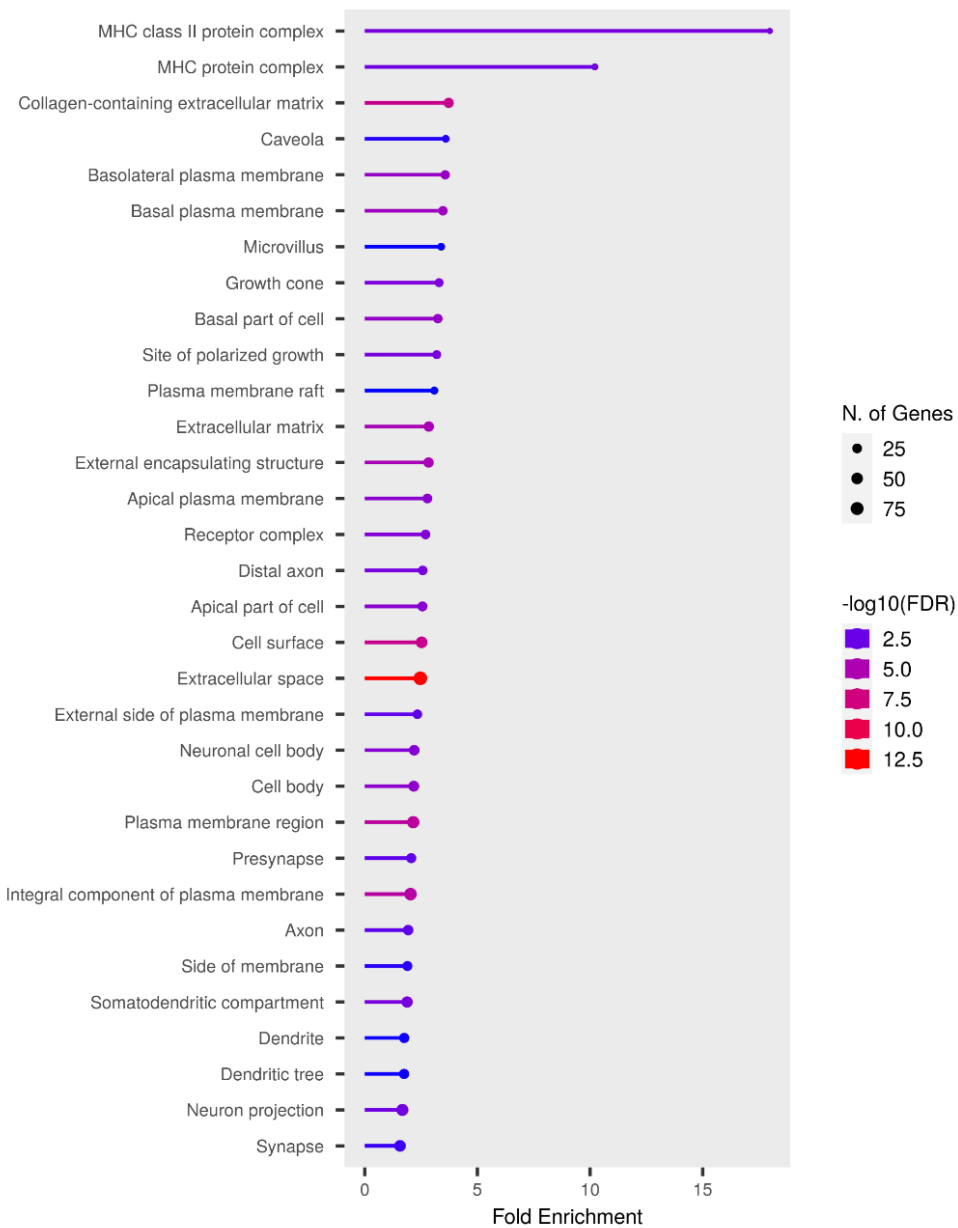

**Fig. S13.**

**Enrichment of various cell compartments (Shiny GO 0.77) within the differentially expressed gene set of CNO Cre<sup>+</sup> placentas compared to controls (Saline, CNO Cre<sup>-</sup>) determined by bulk RNA-sequencing (n=6 per group, hM3Dq<sup>F/F</sup> dam x *Gcm1*-Cre<sup>+/-</sup> sire, GD 14.5).**

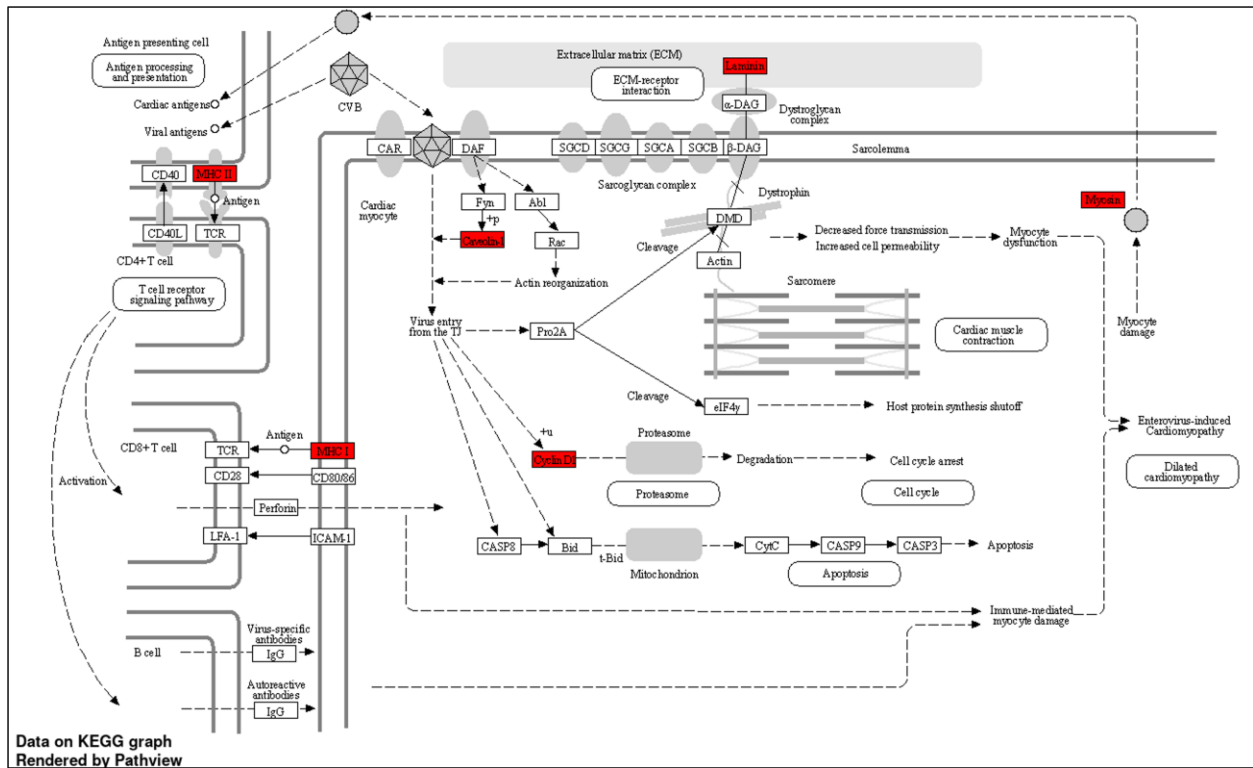

**Fig. S14.**  
KEGG pathway analysis (ShinyGO 0.77) within the differentially expressed gene set in CNO Cre<sup>+</sup> placenta vs. controls (Saline, CNO Cre<sup>-</sup>) determined by bulk RNA-sequencing (n=6 per group, *hm3Dq*<sup>F/F</sup> dam x *Gcm1*-Cre<sup>+/-</sup> sire, GD 14.5). Red indicates enrichment.

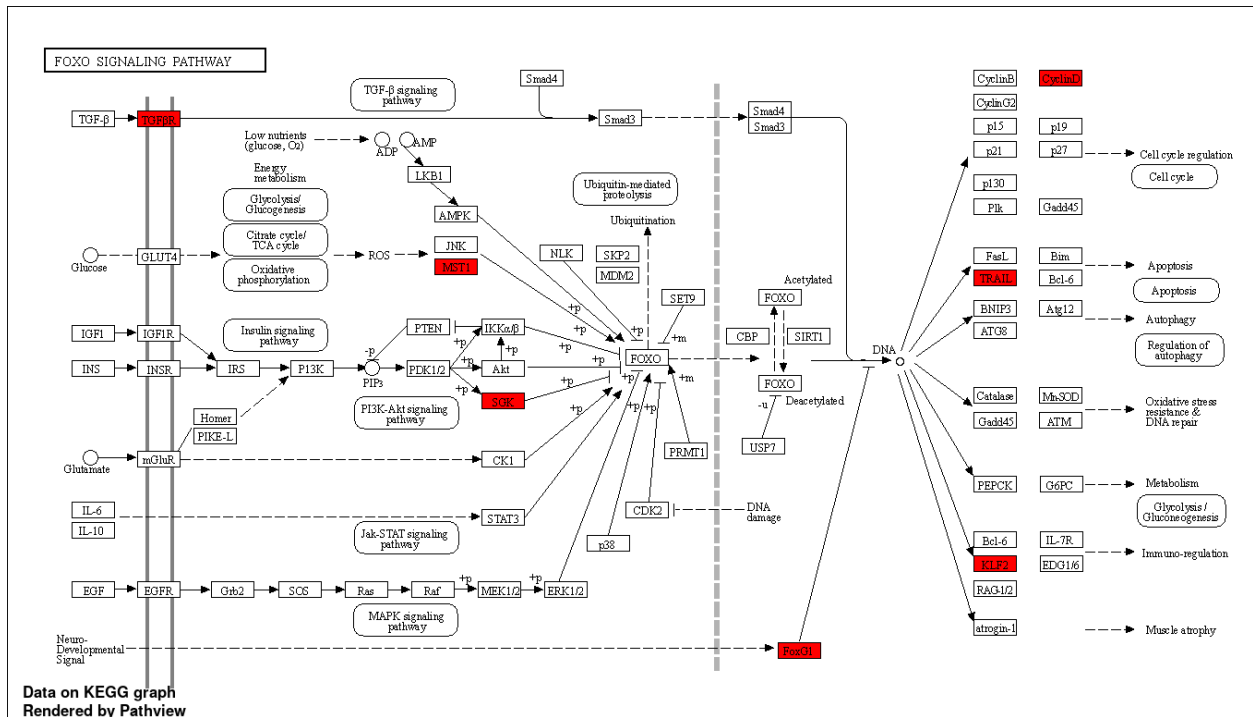

**Fig. S15.** KEGG pathway analysis for the FOXO signaling pathway (ShinyGO 0.77) within the differentially expressed gene set in CNO Cre<sup>+</sup> placenta vs. controls (Saline, CNO Cre<sup>-</sup>) determined by bulk RNA-sequencing (n=6 per group, *hM3Dq*<sup>F/F</sup> dam x *Gcm1*-Cre<sup>+/-</sup> sire, GD 14.5). Red indicates enrichment.



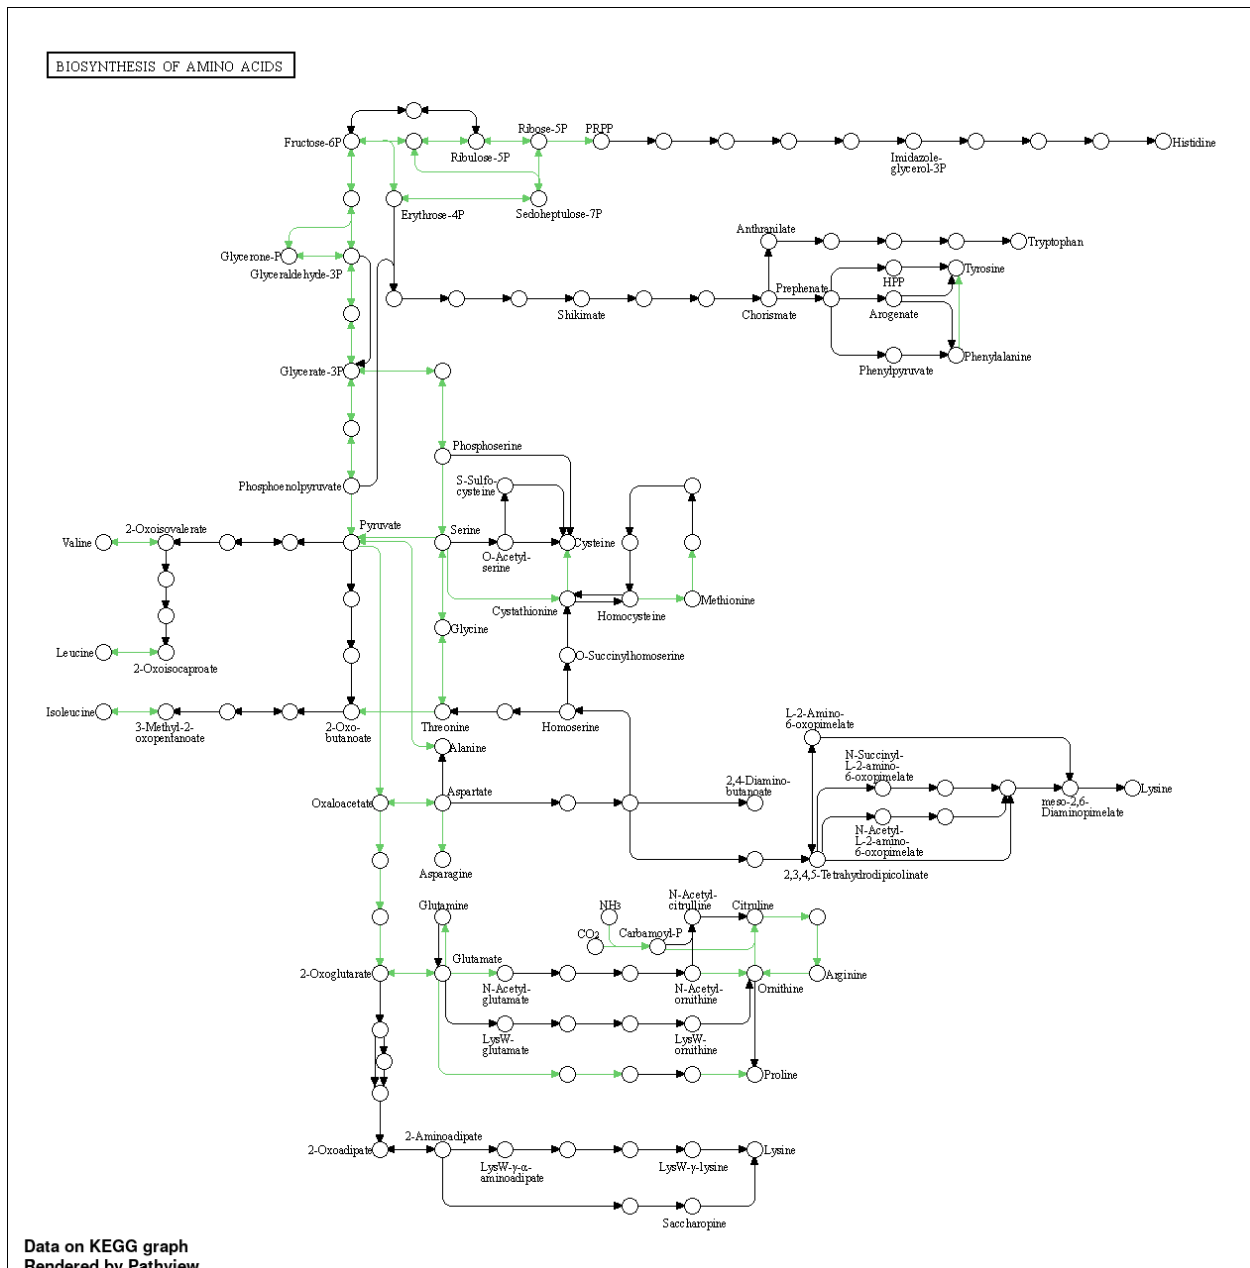

**Fig. S16.**

**KEGG pathway analysis for biosynthesis of amino acids (ShinyGO 0.77) within the downregulated gene set in CNO Cre<sup>+</sup> placenta vs. saline determined by bulk RNA-sequencing (n=6 per group, *hM3Dq*<sup>F/F</sup> dam x *Gcm1*-Cre<sup>+/-</sup> sire, GD 14.5). Green arrows indicate affected processing.**

BIOSYNTHESIS OF COFACTORS

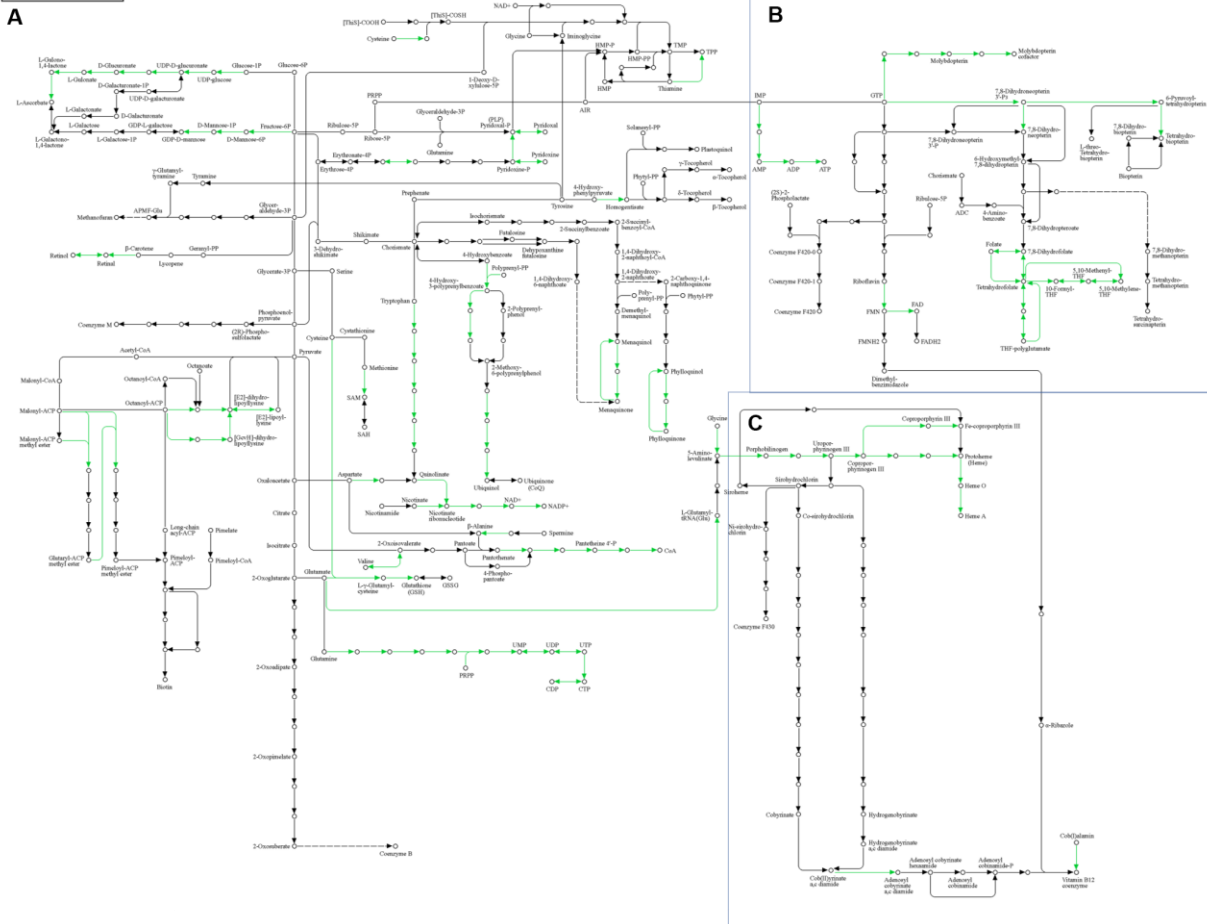

BIOSYNTHESIS OF COFACTORS

A

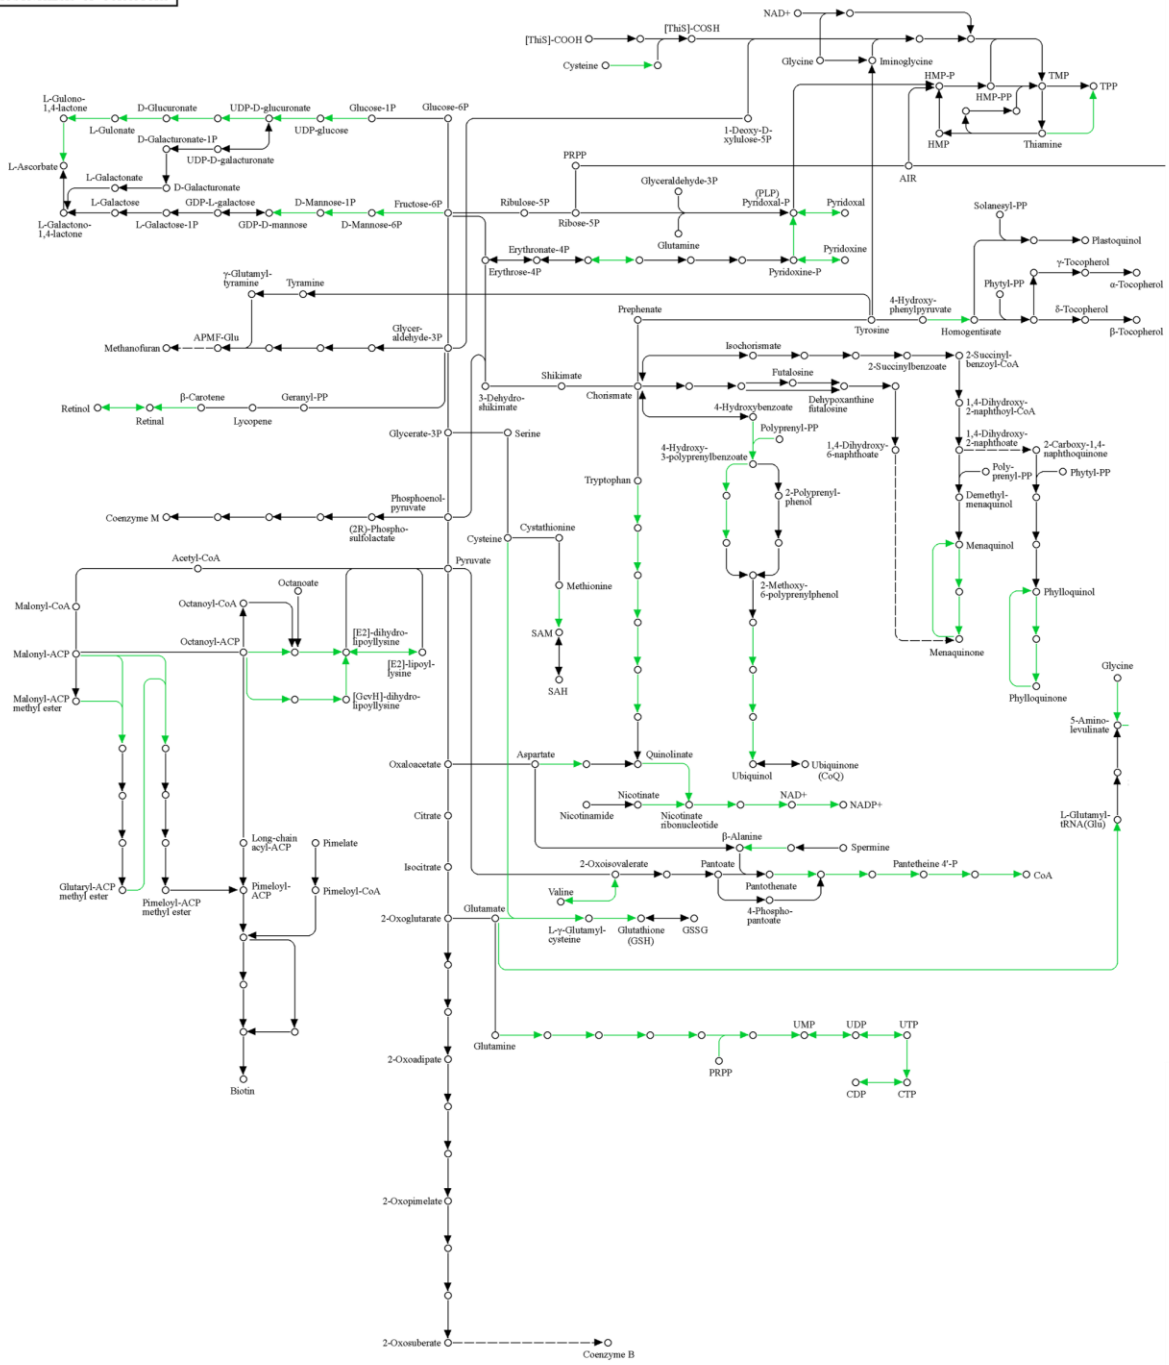

**B**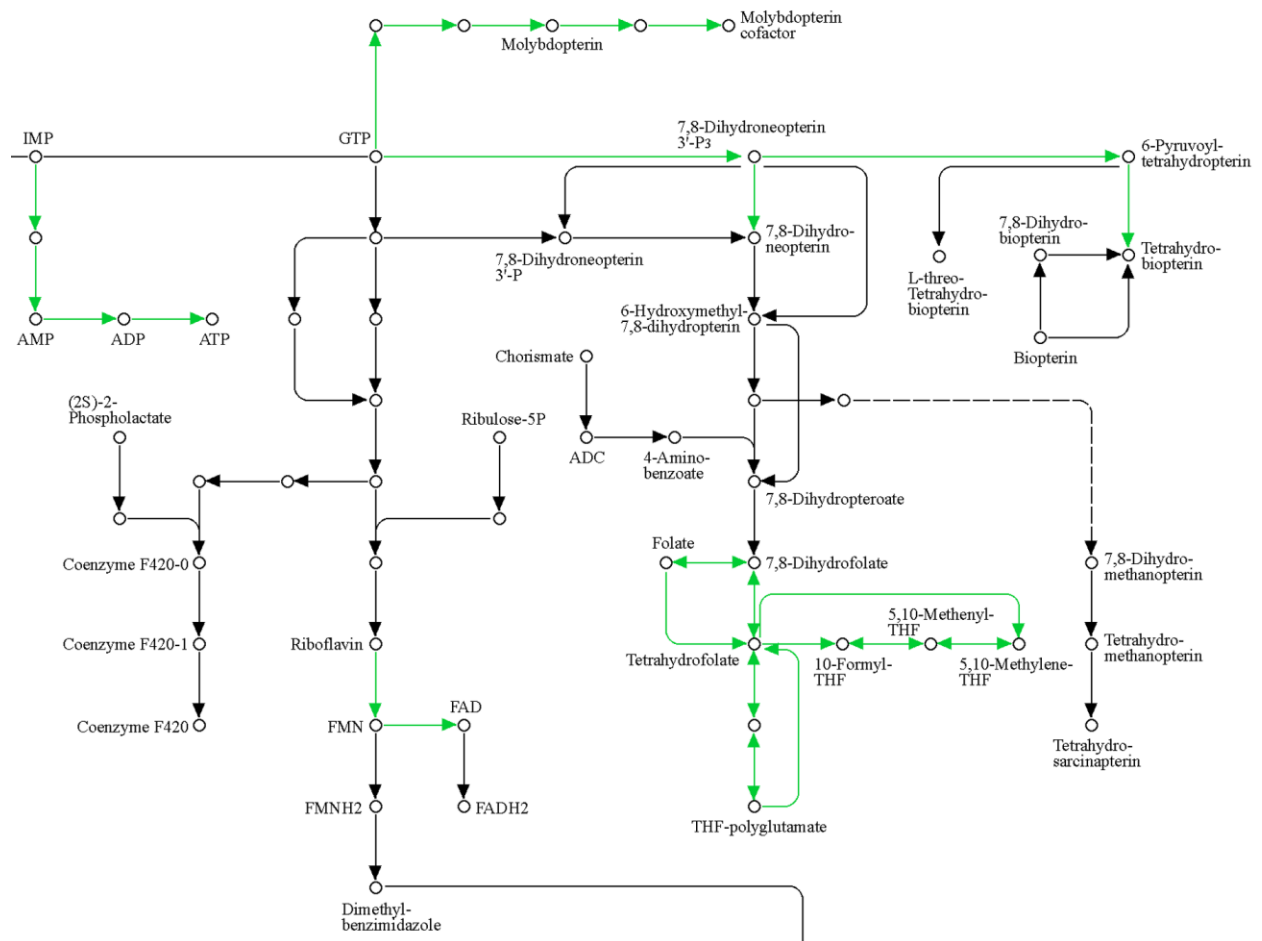

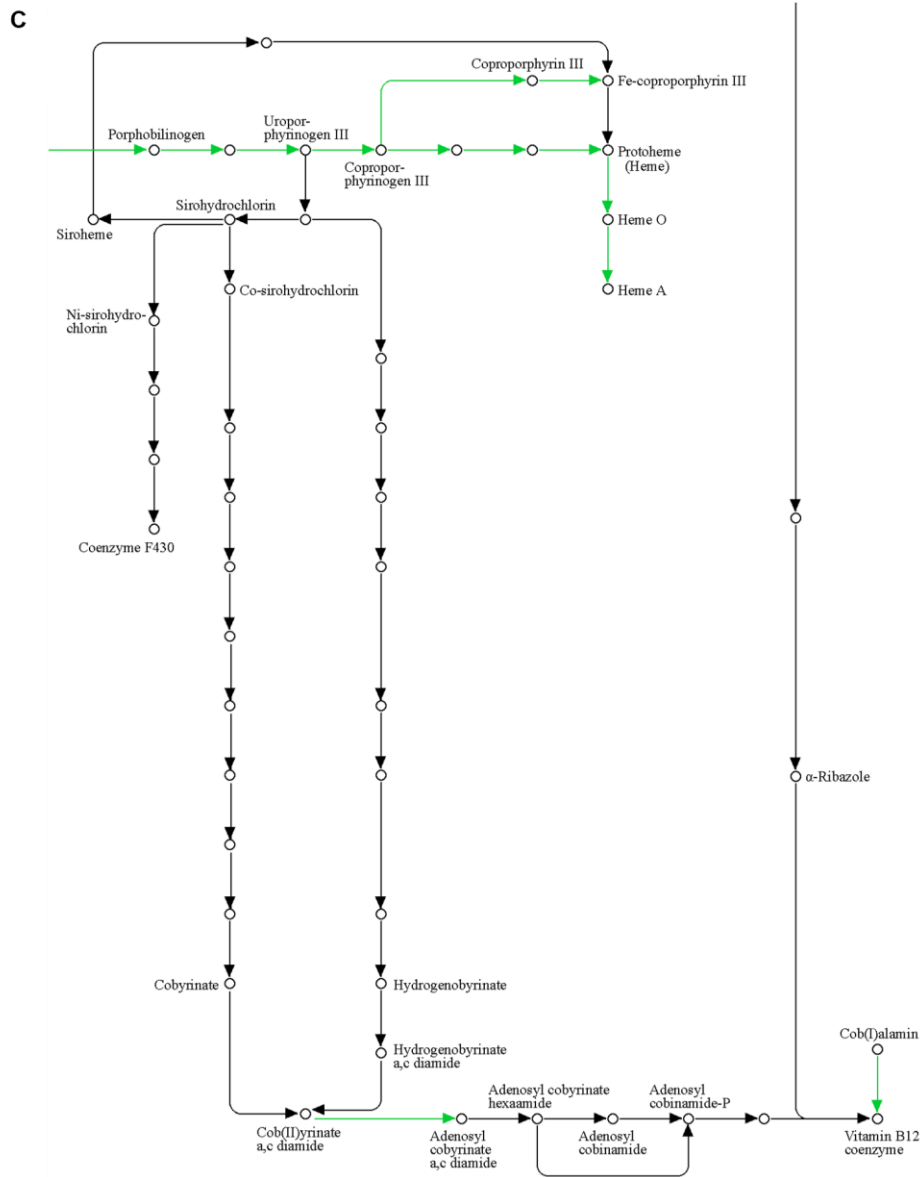

**Fig. S17.**  
**KEGG pathway analysis for biosynthesis of cofactors (ShinyGO 0.77) within the downregulated gene set in CNO Cre<sup>+</sup> placenta vs. saline determined by bulk RNA-sequencing (n=6 per group, *hM3Dq*<sup>F/F</sup> dam x *Gcm1*-Cre<sup>+/-</sup> sire, GD 14.5). Green arrows indicate affected processing.**

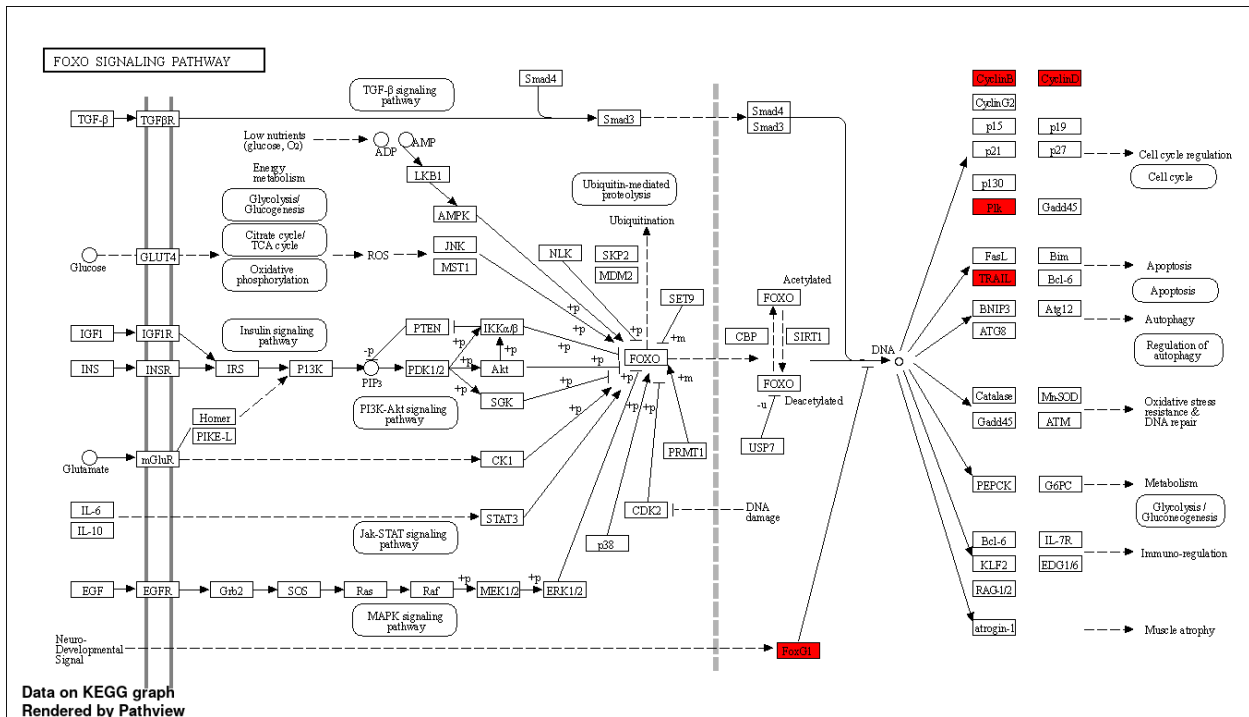

**Fig. S18.** KEGG pathway analysis for the FOXO signaling pathway (ShinyGO 0.77) within the downregulated gene set in CNO+MitoQ Cre<sup>+</sup> placenta vs. CNO Cre<sup>+</sup> determined by bulk RNA-sequencing (n=6 per group, *hM3Dq*<sup>F/F</sup> dam x *Gcm1*-Cre<sup>+/-</sup> sire, GD 14.5). Red indicates enrichment.

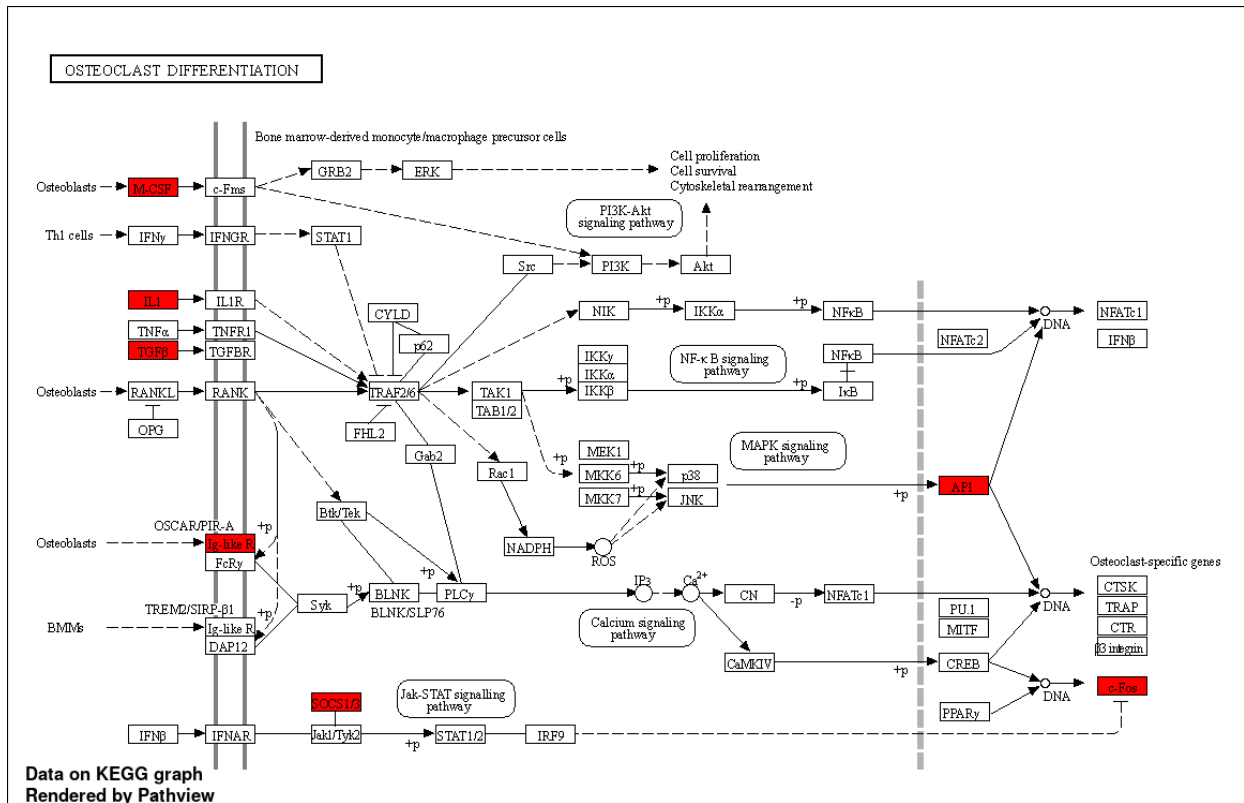

**Fig. S19.** KEGG pathway analysis for the osteoclast differentiation pathway (ShinyGO 0.77) within the differentially expressed gene set in CNO+MitoQ Cre<sup>+</sup> placenta vs. CNO Cre<sup>+</sup> determined by bulk RNA-sequencing (n=6 per group, *hM3Dq*<sup>F/F</sup> dam x *Gcm1*-Cre<sup>+/-</sup> sire, GD 14.5). Red indicates enrichment.

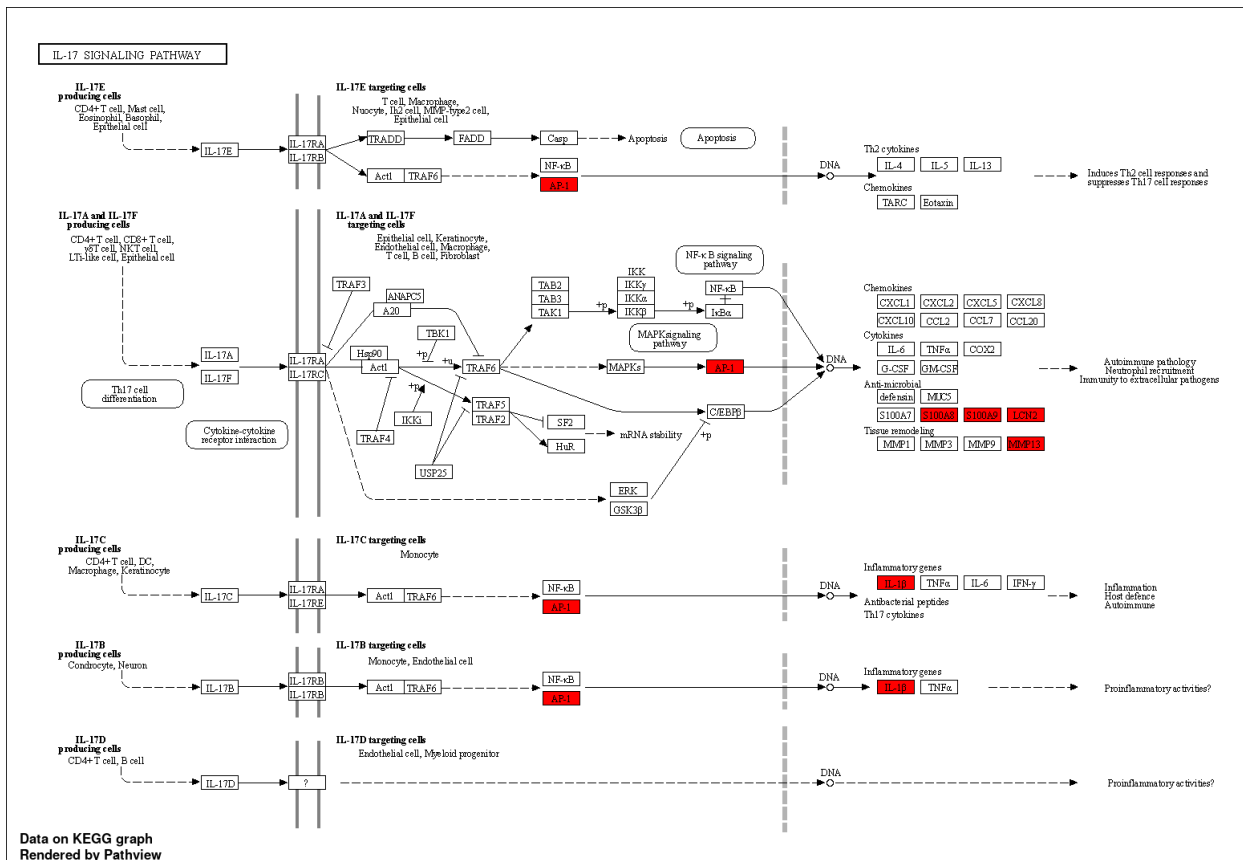

**Fig. S20.**

KEGG pathway analysis for the IL-17 signaling pathway (ShinyGO 0.77) within the differentially expressed gene set in CNO+MitoQ Cre<sup>+</sup> placenta vs. CNO Cre<sup>+</sup> determined by bulk RNA-sequencing (n=6 per group, *hM3Dq*<sup>F/F</sup> dam x *Gcm1*-Cre<sup>+/−</sup> sire, GD 14.5). Red indicates enrichment.



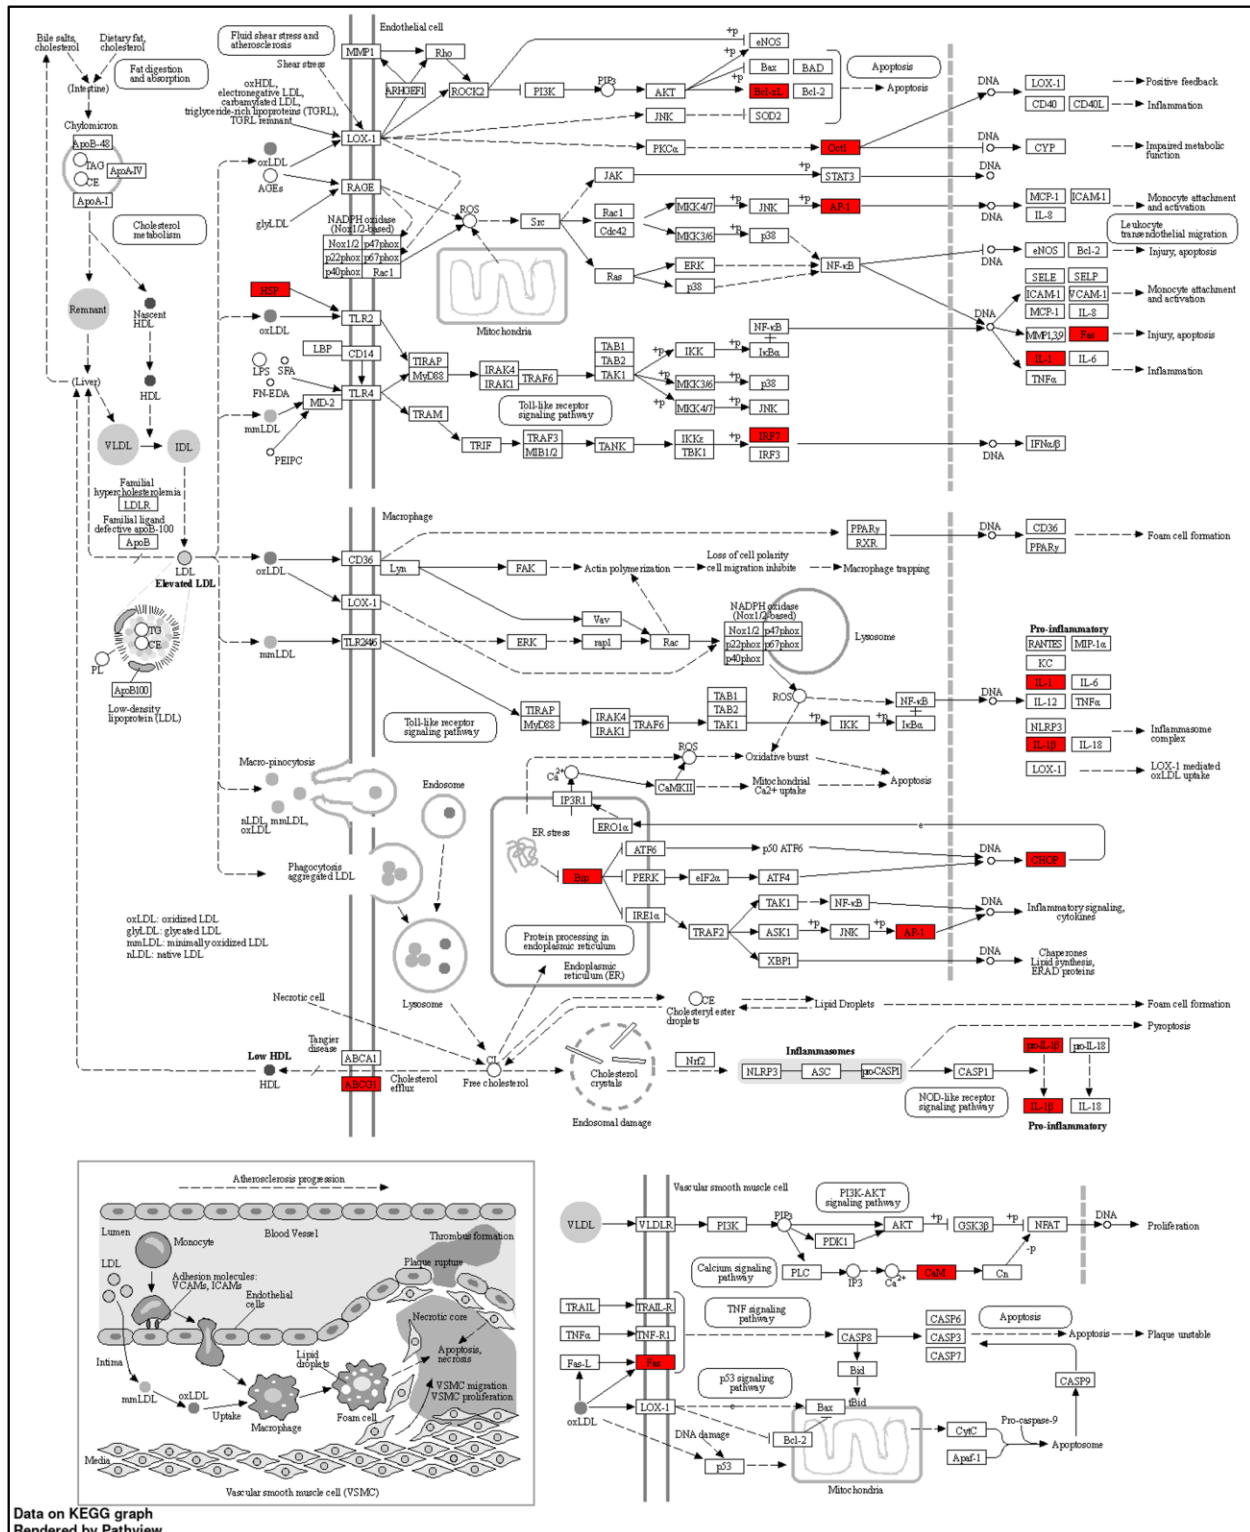

**Fig. S21.**

**KEGG pathway analysis (ShinyGO 0.77) within the differentially expressed gene set in CNO+MitoQ Cre<sup>+</sup> placenta vs. CNO Cre<sup>+</sup> determined by bulk RNA-sequencing (n=6 per group, *hm3Dq*<sup>F/F</sup> dam x *Gcm1*-Cre<sup>+/-</sup> sire, GD 14.5). Red indicates enrichment.**

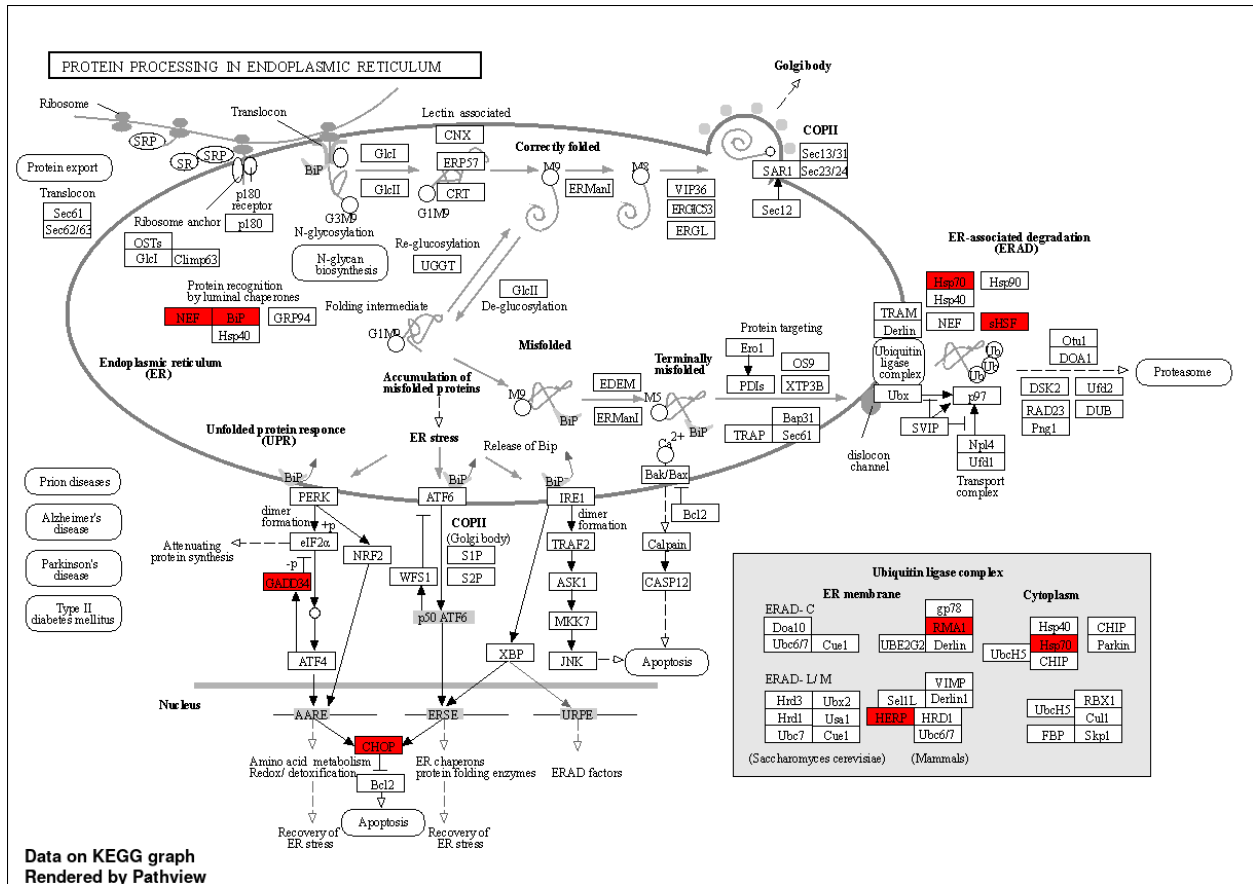

**Fig. S22.**

**KEGG pathway analysis for protein processing in the endoplasmic reticulum (ShinyGO 0.77) within the upregulated gene set in CNO+MitoQ Cre<sup>+</sup> placenta vs. CNO Cre<sup>+</sup> determined by bulk RNA-sequencing (n=6 per group, *hM3Dq*<sup>F/F</sup> dam x *Gcm1*-Cre<sup>+/-</sup> sire, GD 14.5). Red indicates enrichment.**

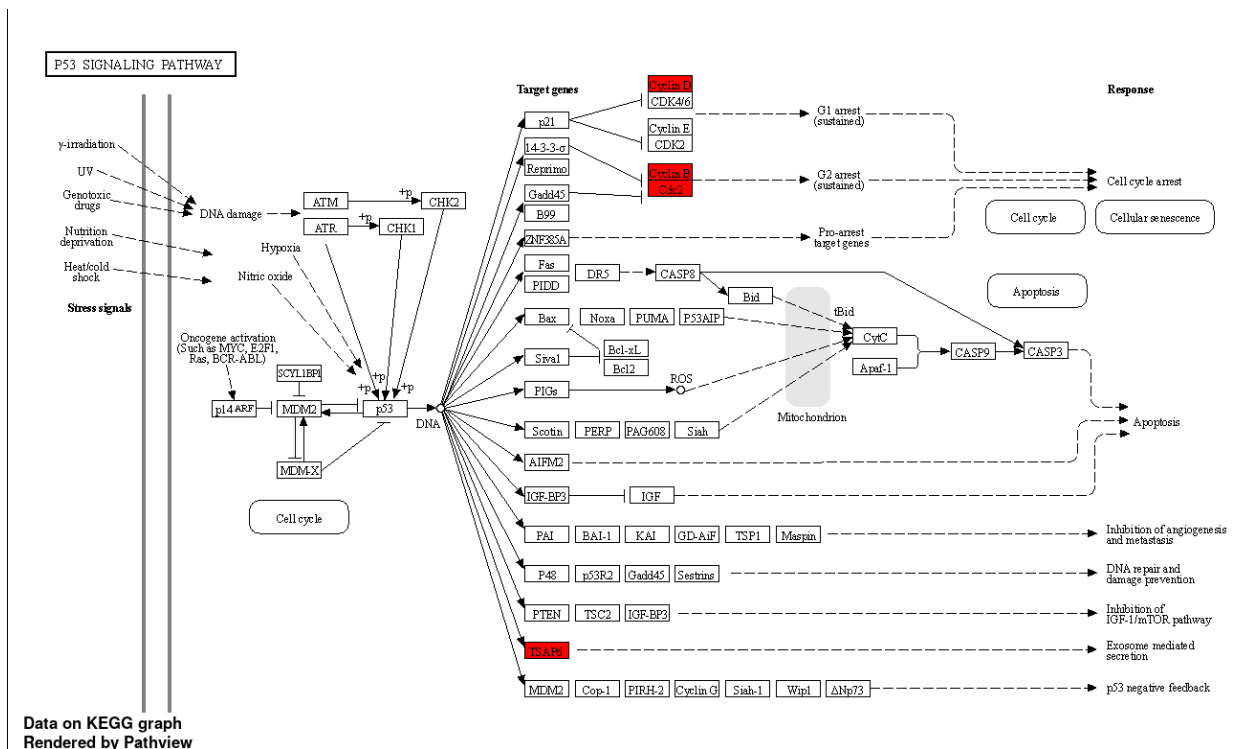

**Fig. S23.**

**KEGG pathway analysis for P53 signaling (ShinyGO 0.77) within the downregulated gene set in CNO+MitoQ Cre<sup>+</sup> placenta vs. CNO Cre<sup>+</sup> determined by bulk RNA-sequencing (n=6 per group, *hM3Dq*<sup>F/F</sup> dam x *Gcm1-Cre*<sup>+/-</sup> sire, GD 14.5). Red indicates enrichment.**

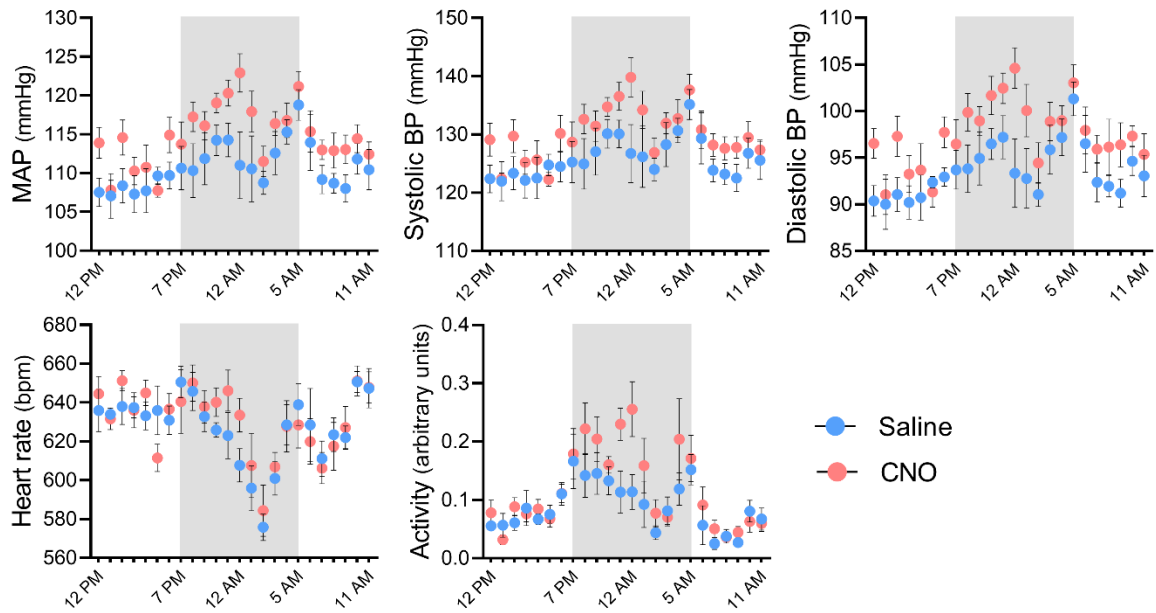

**Fig. S24.**

Primary maternal hemodynamic parameters in *hM3Dq<sup>F/F</sup>* dam x *Gcm1-Cre<sup>+/-</sup>* sire pregnancies. Hourly average from GD 13 to 16.5 (Saline n=6, CNO n=8); MAP, mean arterial pressure. BP, blood pressure.

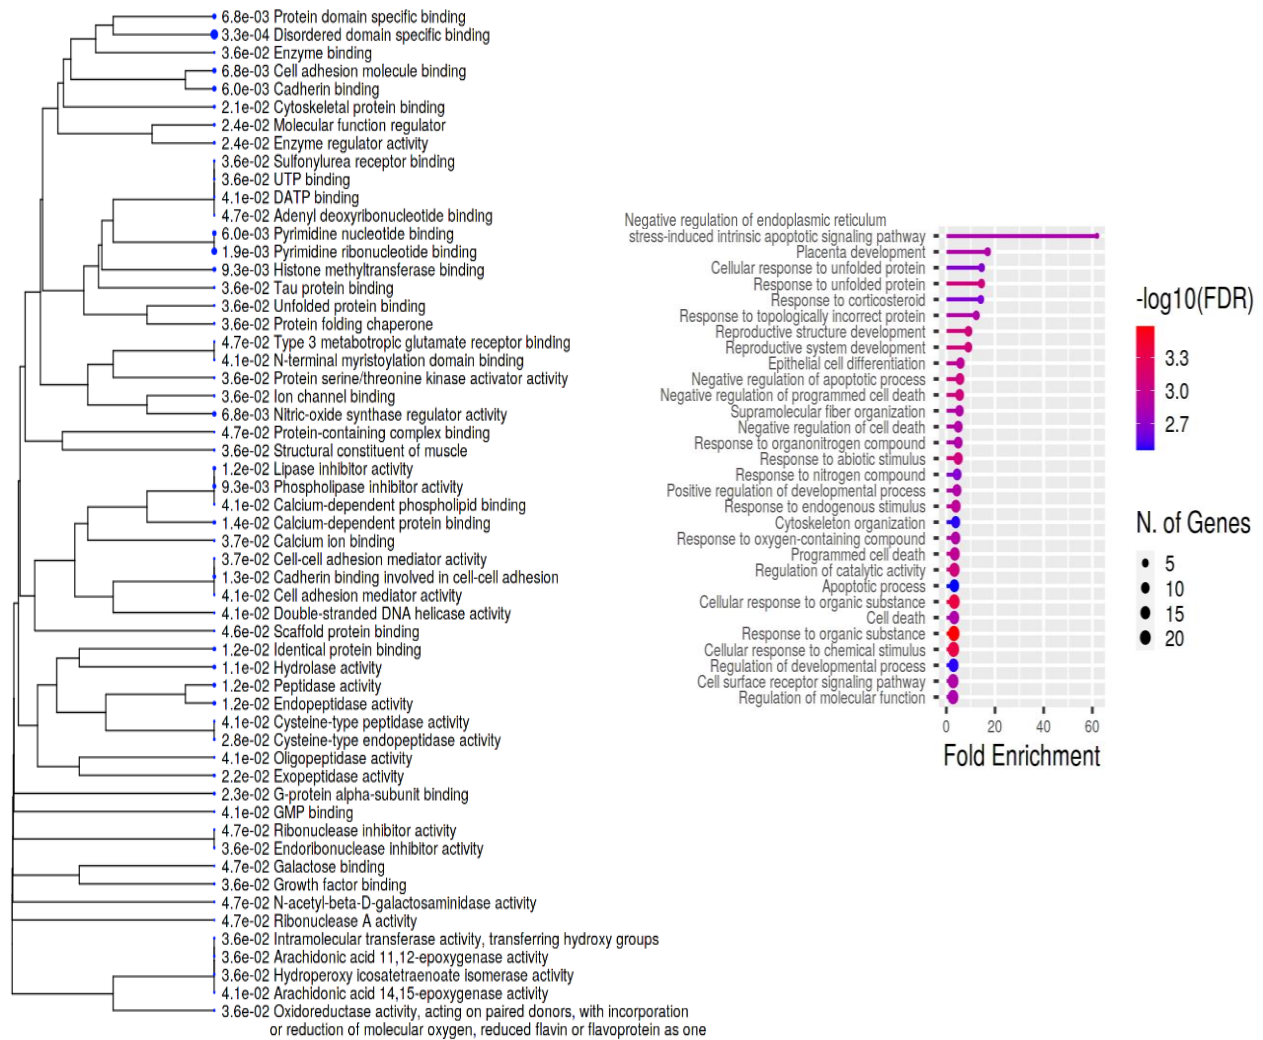

**Fig. S25.** Upregulated gene ontology molecular function (left) and biological processes terms (right) (ShinyGO 0.74.1) within human preeclamptic syncytiotrophoblasts compared to control syncytiotrophoblasts determined by single-cell RNA sequencing (n=4 per group). Gene set from Zhang et al. (8).

Saline rep1

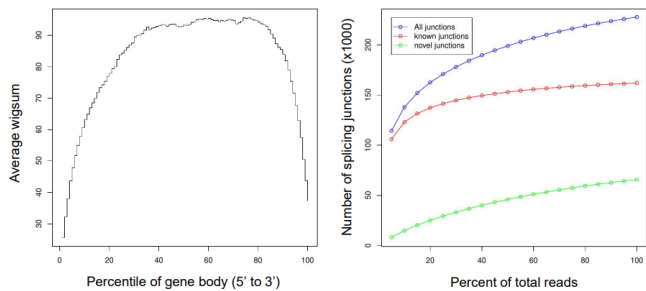

Saline rep2

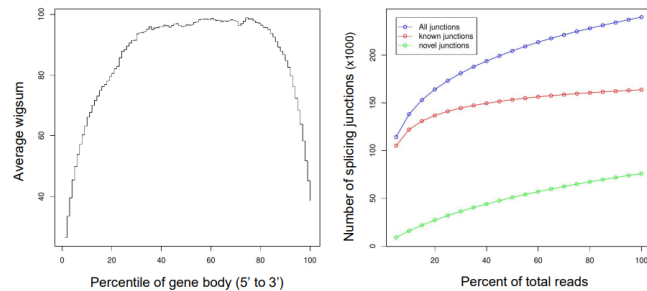

Saline rep3

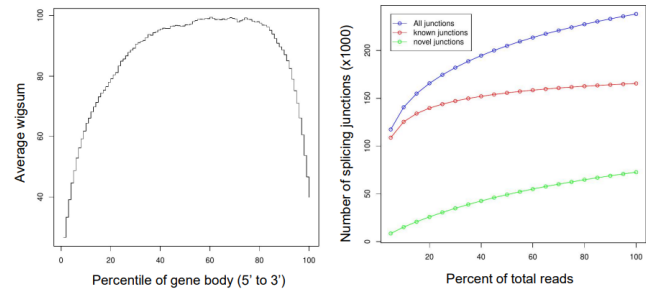

Saline rep4

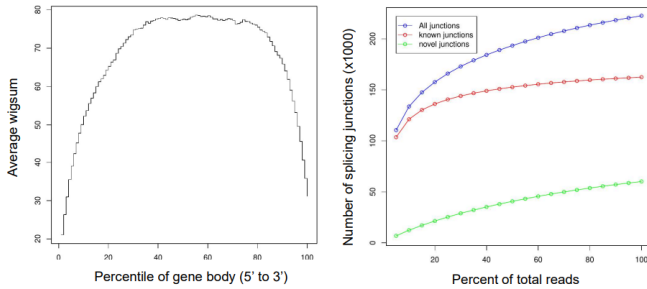

Saline rep5

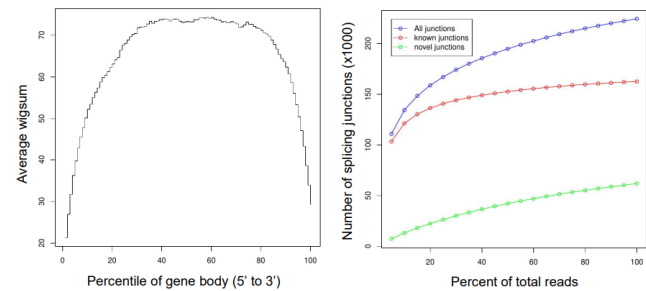

Saline rep6

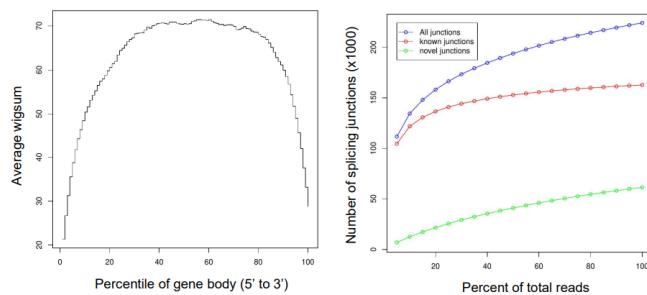

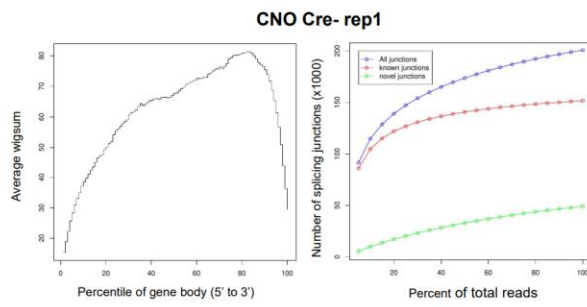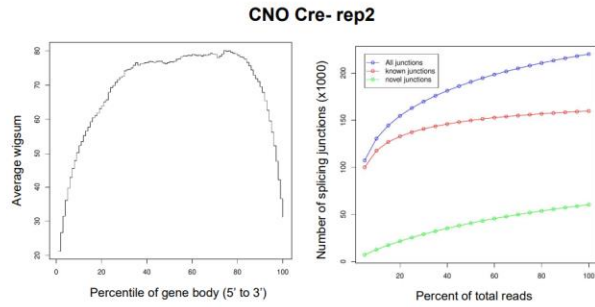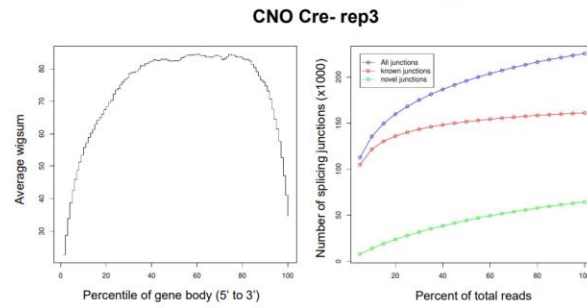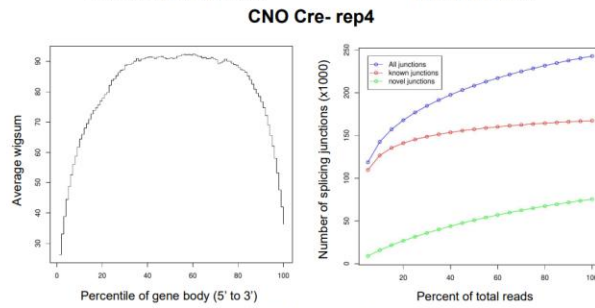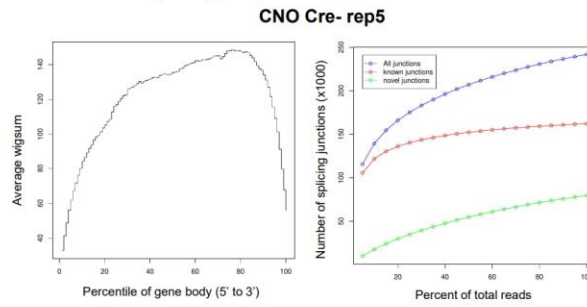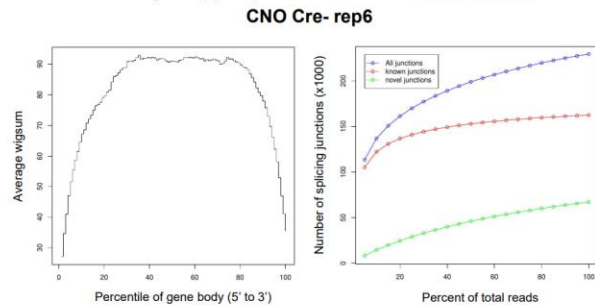

CNO Cre+ rep1

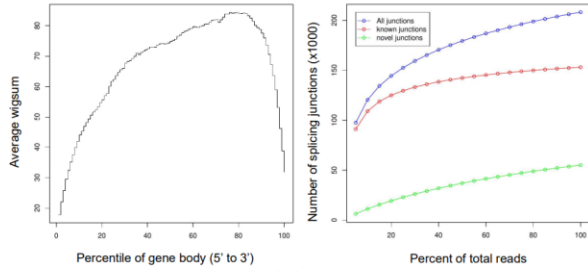

CNO Cre+ rep2

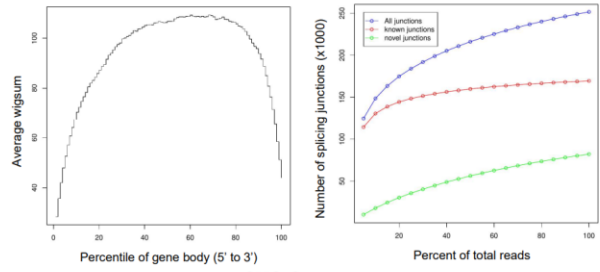

CNO Cre+ rep3

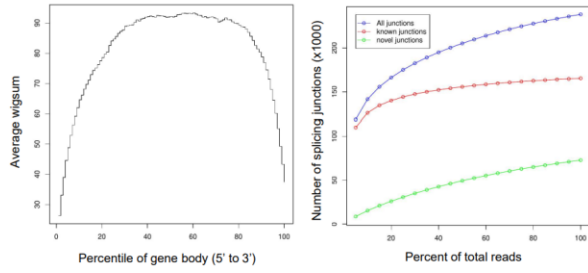

CNO Cre+ rep4

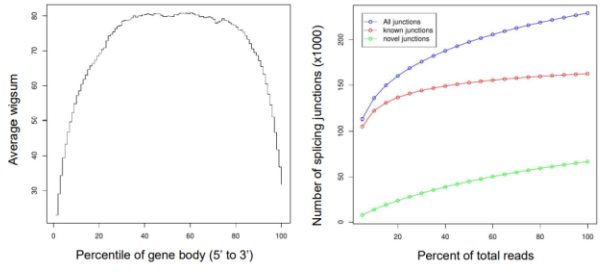

CNO Cre+ rep5

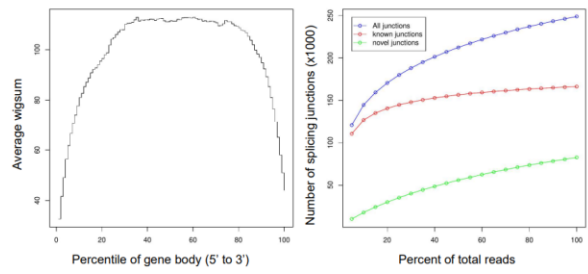

CNO Cre+ rep6

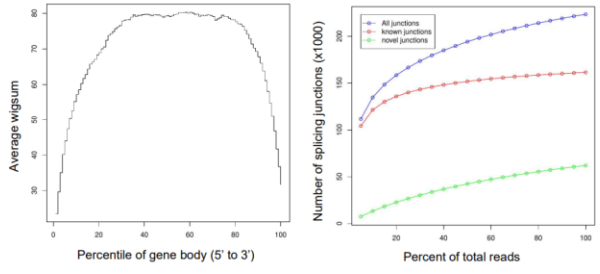



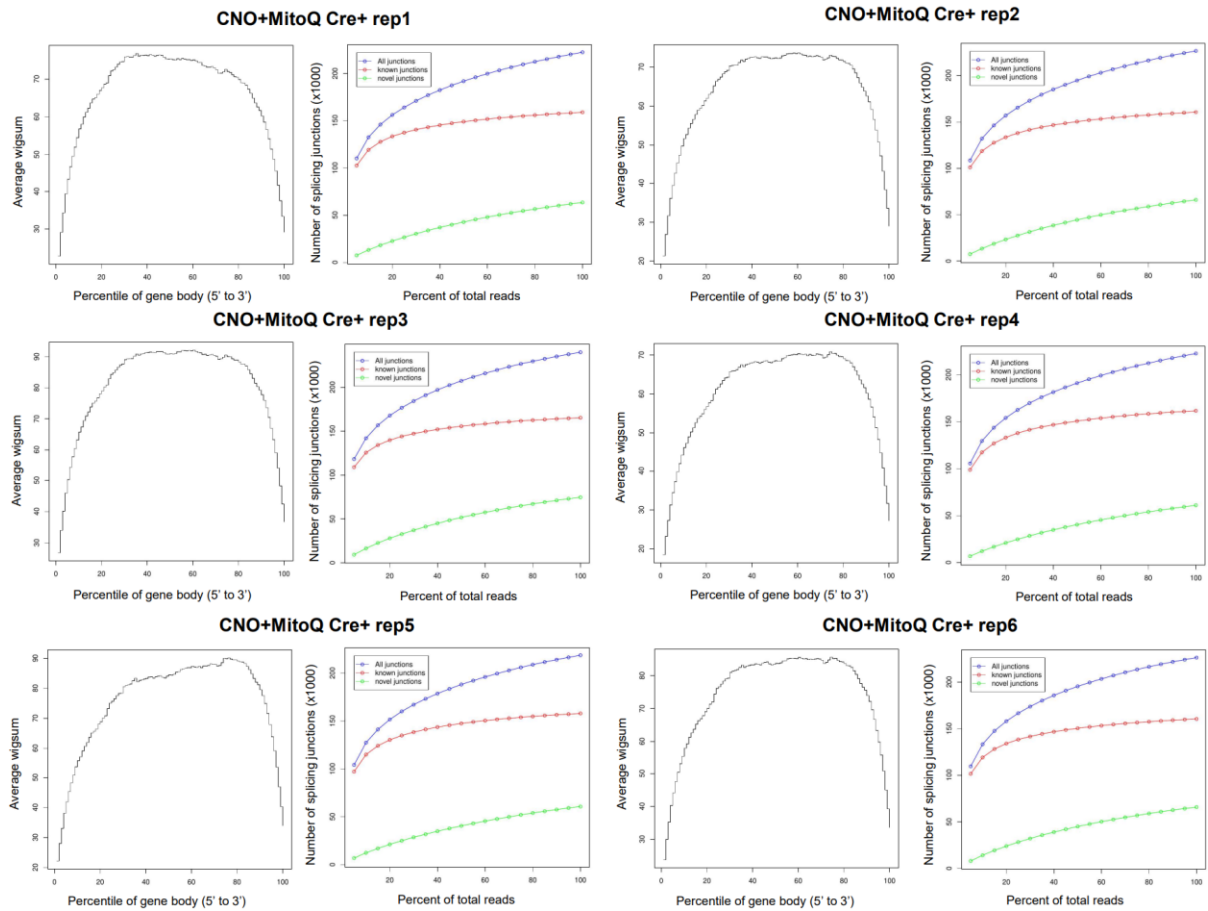

**Fig. S26.**

RSeQC outputs of aligned bulk RNA-sequencing data from *hM3Dq<sup>F/F</sup> dam x Gcm1-Cre<sup>+/-</sup> sire placentas*. Left panels depict gene body coverage and right panels illustrate splice junction saturation plots.

**Table S1.**

**Effect of experimental manipulations on fetoplacental unit numbers and resorptions (Saline n=10, CNO Control n=3, MitoQ Control n=3, CNO n=15, CNO+MitoQ n=8, GD 14.5).**

|                             | <b>Saline</b>                                                   | <b>CNO Control</b>                                  | <b>MitoQ Control</b>                                | <b>CNO</b>                                                      | <b>CNO + MitoQ</b>                                              |
|-----------------------------|-----------------------------------------------------------------|-----------------------------------------------------|-----------------------------------------------------|-----------------------------------------------------------------|-----------------------------------------------------------------|
| Dam x Sire                  | <i>hM3Dq</i> <sup>F/F</sup> x<br><i>Gcm1-Cre</i> <sup>+/-</sup> | C57BL/6J x<br><i>Gcm1-Cre</i> <sup>+/- or -/-</sup> | C57BL/6J x<br><i>Gcm1-Cre</i> <sup>+/- or -/-</sup> | <i>hM3Dq</i> <sup>F/F</sup> x<br><i>Gcm1-Cre</i> <sup>+/-</sup> | <i>hM3Dq</i> <sup>F/F</sup> x<br><i>Gcm1-Cre</i> <sup>+/-</sup> |
| Fetoplacental units per dam | 7 (4-9)                                                         | 8 (5-10)                                            | 3 (3-5)                                             | 6 (4-8)                                                         | 6 (4-7)                                                         |
| Resorption count per dam    | 1 (0-1)                                                         | 0 (0-1)                                             | 0 (0-1)                                             | 2 (0-2)                                                         | 2 (0-2)                                                         |

Data reported as median (25<sup>th</sup>-75<sup>th</sup> percentile)

**Table S2.**

**Differentially expressed HIF1 $\alpha$  target genes within placental RNA-sequencing dataset of *hM3Dq<sup>F/F</sup>* dam x *Gcm1-Cre<sup>+/-</sup>* sire pregnancies (n=6 per group, GD 14.5). *Mus Musculus* HIF1 $\alpha$  target genes curated by TFLink (PMID: 36124642). \*inferred by curator but not confirmed by chromatin immunoprecipitation assay. **Bold** refers to transcripts differentially expressed in both datasets (CNO Cre<sup>+</sup> vs. Saline and CNO Cre<sup>+</sup> vs. CNO Cre<sup>-</sup>).**

---

| <b>Differentially Expressed HIF1<math>\alpha</math> Targets (<i>P</i> &lt; 0.05)</b> |                                                                                                                                                                                                                                                                                                                                                                                                                                              |
|--------------------------------------------------------------------------------------|----------------------------------------------------------------------------------------------------------------------------------------------------------------------------------------------------------------------------------------------------------------------------------------------------------------------------------------------------------------------------------------------------------------------------------------------|
| CNO Cre <sup>+</sup> vs. Saline                                                      | <i>Calcr1, Arl14epl, Pnoc, Arl15, Rgcc, Dcx</i> *, <i>Hsph1, Dmkn, Slc7a6, Abcc1, Psat1, Gm20721, Ets1, Greb1, Foxa1, Sohlh2, Gcat, Fli1, Mthfd1l, Ginn1, Rgs2, Mdk</i> *, <i>Fkbp4, Apold1, Usp2, Klf2, Pigx, Mboat7, Pde4b, Npas2, Mab21l2, Efh2, Mpp2, Dll4</i> *, <i>Triap1, Lap3, Kbtbd6, Gla, Ntml, Ost4, Mfsd5, Rab24, Slc39a13, Larp4, Tasor2, Setd1b, Bdp1, Cbx5, Prr12, Tiam1, Mybl2, Pole, Atad2, Gas2l3, Atad5, Esco2, Zbed6</i> |
| CNO Cre <sup>+</sup> vs. CNO Cre <sup>-</sup>                                        | <i>Dcx</i> *, <i>Retnla</i> *, <i>Ccnd2, Abcb1b, Rb1, Slc7a6, Mt1, Ets1, Bcl11b, Samd1, Kcnn4, Atf5, Arl15, Tfrc, Bcor1l, Hcfc1r1, Cdk5rap1, Ier3, Mpp7, Plpp5, Ahcy12, Gadd45g, Smim14, Lmna, Ptpn4, Serpine1</i> *, <i>Acsl4</i>                                                                                                                                                                                                           |

---

**Table S3.**

**Concentration of immune and cardiovascular factors within maternal plasma in *hM3Dq*<sup>F/F</sup> dam x *Gcm1-Cre*<sup>+/-</sup> sire mouse pregnancies (Saline n=5, CNO n=11, CNO+MitoQ n=3, GD 14.5); Data represent mean ± SEM. \**P* < 0.05, multiple unpaired *t* tests (2-tailed) of log transformed data.**

|                        | Saline    | CNO     | CNO+MitoQ | <i>P</i><br>CNO vs.<br>Saline | <i>P</i><br>CNO+MitoQ<br>vs. CNO |
|------------------------|-----------|---------|-----------|-------------------------------|----------------------------------|
| MMP9 (ng/ml)           | 0.4±0.1   | 2.2±0.4 | 3.4±2.2   | 0.0009*                       | 0.55                             |
| LIX (ng/ml)            | 2±0.3     | 4.7±0.5 | 1.1±0.5   | 0.0002*                       | 0.0003*                          |
| IL12p40 (pg/ml)        | 19±8.3    | 43±7.9  | 18±9.5    | 0.01*                         | 0.03*                            |
| MDC (pg/ml)            | 135±43    | 288±39  | 135±22    | 0.02*                         | 0.049*                           |
| IP10 (pg/ml)           | 116±12    | 151±7.7 | 139±19    | 0.03*                         | 0.51                             |
| MCP5 (pg/ml)           | 178±29    | 252±19  | 584±64    | 0.04*                         | 0.0002*                          |
| IL3 (pg/ml)            | 1.4±0.6   | 9±4.5   | 3.4±1.4   | 0.05                          | 0.73                             |
| IL6 (pg/ml)            | 16±4.2    | 87±37   | 352±318   | 0.07                          | 0.33                             |
| PAI1 (ng/ml)           | 3.6±0.8   | 5.2±0.5 | 4.9±1.5   | 0.07                          | 0.70                             |
| TARC (pg/ml)           | 102±11    | 159±23  | 103±16    | 0.09                          | 0.18                             |
| MCSF (pg/ml)           | 24±4.2    | 37±5.2  | 28±4.7    | 0.11                          | 0.42                             |
| Eotaxin (pg/ml)        | 562±69    | 700±51  | 517±59    | 0.14                          | 0.10                             |
| TNFα (pg/ml)           | 12±3.2    | 79±61   | 11±2.9    | 0.15                          | 0.34                             |
| IFNγ (pg/ml)           | 8.8±5.9   | 9.6±2.4 | 6.5±1.3   | 0.15                          | 0.63                             |
| MIG (pg/ml)            | 544±55    | 755±60  | 590±119   | 0.16                          | 0.39                             |
| IL13 (pg/ml)           | 70±19     | 100±19  | 101±8.2   | 0.19                          | 0.68                             |
| IL1β (pg/ml)           | 5.2±1.6   | 979±963 | 6.6±1.2   | 0.20                          | 0.47                             |
| EPO (pg/ml)            | 843±500   | 366±38  | 453±77    | 0.26                          | 0.29                             |
| GMCSF (pg/ml)          | 16±3.8    | 20±2.6  | 23±1.5    | 0.27                          | 0.43                             |
| IL17 (pg/ml)           | 12±7.1    | 34±21   | 9.9±3.1   | 0.27                          | 0.61                             |
| RANTES (pg/ml)         | 25±6.1    | 207±164 | 24±5.5    | 0.27                          | 0.53                             |
| TIMP1 (ng/ml)          | 6.8±1.8   | 4.8±0.7 | 26±13     | 0.28                          | 0.00                             |
| IL10 (pg/ml)           | 8.5±0.6   | 315±294 | 9.8±4.9   | 0.29                          | 0.32                             |
| IL1α (pg/ml)           | 186±31    | 357±77  | 218±88    | 0.29                          | 0.41                             |
| MIP1β (pg/ml)          | 123±26    | 137±8.7 | 132±19    | 0.29                          | 0.78                             |
| IL4 (pg/ml)            | 0.8±0.2   | 76±73   | 0.5±0.08  | 0.30                          | 0.31                             |
| MIP3α (pg/ml)          | 107±10    | 182±53  | 284±183   | 0.30                          | 0.59                             |
| IFNβ1 (pg/ml)          | 132±25    | 196±45  | 148±22    | 0.32                          | 0.74                             |
| MCP1 (pg/ml)           | 76±18     | 299±195 | 87±30     | 0.35                          | 0.46                             |
| MIP3β (pg/ml)          | 220±18    | 238±11  | 366±78    | 0.36                          | 0.01*                            |
| IL12p70 (ng/ml)        | 0.04±0.01 | 1.7±1.6 | 0.04±0.02 | 0.38                          | 0.38                             |
| Thrombomodulin (ng/ml) | 18±4.7    | 22±2.7  | 11±7.2    | 0.38                          | 0.06                             |

|                       |          |         |          |      |       |
|-----------------------|----------|---------|----------|------|-------|
| KC (pg/ml)            | 115±29.3 | 129±21  | 335±218  | 0.48 | 0.20  |
| LIF (pg/ml)           | 3±2.4    | 0.9±0.4 | 0.6±0.5  | 0.50 | 0.82  |
| Pecam1 (ng/ml)        | 1.8±1.1  | 2±0.4   | 2±0.4    | 0.50 | 0.72  |
| MIP2 (pg/ml)          | 265±35   | 324±39  | 236±49   | 0.57 | 0.36  |
| sICAM (ng/ml)         | 3.5±0.5  | 3.9±0.3 | 3.9±0.6  | 0.58 | 0.91  |
| sPSelectin (ng/ml)    | 68±8.7   | 77±10   | 75±14    | 0.63 | 0.97  |
| IL5 (pg/ml)           | 30±15    | 55±43   | 6.4±0.7  | 0.69 | 0.28  |
| MIP1 $\alpha$ (pg/ml) | 97±30    | 99±14   | 104±14   | 0.71 | 0.66  |
| IL16 (ng/ml)          | 29±14    | 23±6.8  | 50±28    | 0.72 | 0.19  |
| VEGF (pg/ml)          | 1.7±1    | 1.3±0.2 | 0.9±0.06 | 0.73 | 0.41  |
| Fractalkine (pg/ml)   | 345±65   | 372±57  | 263±55   | 0.77 | 0.26  |
| sESelectin (ng/ml)    | 24±6     | 25±3.2  | 27±6.3   | 0.84 | 0.76  |
| IL9 (pg/ml)           | 71±17    | 69±6.5  | 67±6.2   | 0.84 | 0.98  |
| IL15 (pg/ml)          | 70±30    | 130±55  | 42±17    | 0.84 | 0.57  |
| IL20 (pg/ml)          | 104±18   | 107±22  | 114±28   | 0.87 | 0.67  |
| IL11 (pg/ml)          | 47±13    | 51±15   | 28±8.1   | 0.93 | 0.52  |
| IL7 (pg/ml)           | 10±4.6   | 15±6.8  | 3.3±3.3  | 0.96 | 0.08  |
| GCSF (ng/ml)          | 1±0.2    | 1.1±0.2 | 2.9±0.5  | 0.97 | 0.01* |
| IL2 (pg/ml)           | 15±8.5   | 13±3    | 6±2.7    | 0.97 | 0.15  |

**Table S4.**

**Concentration of immune and cardiovascular factors within maternal plasma during human preeclampsia (Control n=10, All PreE n=10, “Non-Severe” PreE n=4, Severe PreE=6);** Data represent mean  $\pm$  SEM. \* $P < 0.05$ , multiple unpaired  $t$  tests (2-tailed) of log transformed data. PreE, preeclampsia.

|                       | Control        | All PreE       | “Non-Severe” PreE | Severe PreE    | $P$ All PreE vs. Control | $P$ Severe PreE vs. “Non-Severe” PreE |
|-----------------------|----------------|----------------|-------------------|----------------|--------------------------|---------------------------------------|
| MIP1 $\beta$ (pg/ml)  | 21 $\pm$ 2     | 35 $\pm$ 4.3   | 26 $\pm$ 3.8      | 40 $\pm$ 5.9   | 0.01*                    | 0.16                                  |
| IL6 (pg/ml)           | 4.2 $\pm$ 0.2  | 3.4 $\pm$ 0.9  | 4.9 $\pm$ 1.4     | 2.4 $\pm$ 1    | 0.02*                    | 0.14                                  |
| MMP7 (pg/ml)          | 234 $\pm$ 37   | 365 $\pm$ 47   | 345 $\pm$ 40      | 374 $\pm$ 67   | 0.03*                    | 0.95                                  |
| IL12p40 (pg/ml)       | 62 $\pm$ 3.2   | 115 $\pm$ 27   | 165 $\pm$ 59      | 81 $\pm$ 16    | 0.048*                   | 0.17                                  |
| TIMP2 (ng/ml)         | 96 $\pm$ 4.1   | 112 $\pm$ 6.3  | 100 $\pm$ 9.3     | 117 $\pm$ 7.5  | 0.05                     | 0.20                                  |
| I309 (pg/ml)          | 0.8 $\pm$ 0.1  | 1.5 $\pm$ 0.4  | 1.6 $\pm$ 0.9     | 1.5 $\pm$ 0.3  | 0.06                     | 0.58                                  |
| MMP2 (ng/ml)          | 82 $\pm$ 5.5   | 134 $\pm$ 33   | 83 $\pm$ 11       | 156 $\pm$ 46   | 0.07                     | 0.21                                  |
| TIMP1 (ng/ml)         | 56 $\pm$ 3.2   | 70 $\pm$ 6.9   | 77 $\pm$ 21       | 66 $\pm$ 5.7   | 0.07                     | 0.60                                  |
| Eotaxin (pg/ml)       | 16 $\pm$ 1.2   | 19 $\pm$ 0.8   | 18 $\pm$ 1        | 19 $\pm$ 1.1   | 0.10                     | 0.39                                  |
| TARC (pg/ml)          | 4.7 $\pm$ 1.1  | 8.5 $\pm$ 1.9  | 7.9 $\pm$ 2.9     | 8.9 $\pm$ 2.7  | 0.11                     | 0.85                                  |
| IP10 (pg/ml)          | 110 $\pm$ 22   | 245 $\pm$ 99   | 96 $\pm$ 15       | 344 $\pm$ 157  | 0.12                     | 0.08                                  |
| CTACK (pg/ml)         | 372 $\pm$ 53   | 505 $\pm$ 69   | 442 $\pm$ 110     | 546 $\pm$ 93   | 0.15                     | 0.40                                  |
| MCP4 (pg/ml)          | 12 $\pm$ 3.7   | 18 $\pm$ 4.8   | 11 $\pm$ 4.5      | 23 $\pm$ 7     | 0.18                     | 0.14                                  |
| Eotaxin2 (pg/ml)      | 133 $\pm$ 36.3 | 246 $\pm$ 70   | 193 $\pm$ 46      | 282 $\pm$ 114  | 0.19                     | 0.95                                  |
| TNF $\beta$ (pg/ml)   | 7 $\pm$ 5.1    | 12 $\pm$ 5     | 13 $\pm$ 0.4      | 12 $\pm$ 9.1   | 0.20                     | 0.54                                  |
| MMP10 (ng/ml)         | 1.5 $\pm$ 0.2  | 2.3 $\pm$ 0.5  | 2.2 $\pm$ 0.9     | 2.4 $\pm$ 0.6  | 0.25                     | 0.99                                  |
| IL21 (pg/ml)          | 7.5 $\pm$ 2.6  | 4.5 $\pm$ 1.2  | 4.4 $\pm$ 1.9     | 4.6 $\pm$ 1.7  | 0.27                     | 0.80                                  |
| MCP1 (pg/ml)          | 161 $\pm$ 17   | 225 $\pm$ 35   | 236 $\pm$ 54      | 218 $\pm$ 51   | 0.27                     | 0.66                                  |
| MIP1 $\delta$ (ng/ml) | 1.9 $\pm$ 0.2  | 2.5 $\pm$ 0.4  | 2.4 $\pm$ 0.9     | 2.5 $\pm$ 0.4  | 0.29                     | 0.79                                  |
| MMP3 (ng/ml)          | 7.3 $\pm$ 1    | 11.7 $\pm$ 2.5 | 10.1 $\pm$ 4.2    | 12.4 $\pm$ 3.3 | 0.31                     | 0.85                                  |
| IFN $\gamma$ (pg/ml)  | 6.7 $\pm$ 5.3  | 11 $\pm$ 4.6   | 13 $\pm$ 6        | 8.9 $\pm$ 7.3  | 0.31                     | 0.37                                  |
| IL27 (ng/ml)          | 57 $\pm$ 11    | 398 $\pm$ 135  | 740 $\pm$ 114     | 193 $\pm$ 138  | 0.31                     | 0.048*                                |
| IL8 (pg/ml)           | 1 $\pm$ 0.2    | 2.8 $\pm$ 1.4  | 4.6 $\pm$ 3.5     | 1.6 $\pm$ 0.5  | 0.33                     | 0.41                                  |
| GMCSF (pg/ml)         | 44 $\pm$ 5.3   | 74 $\pm$ 25    | 68 $\pm$ 16       | 77 $\pm$ 41    | 0.34                     | 0.63                                  |
| IL15 (pg/ml)          | 19 $\pm$ 16    | 13 $\pm$ 6.9   | 20 $\pm$ 16       | 7.8 $\pm$ 1.4  | 0.38                     | 0.90                                  |
| IL1 $\beta$ (pg/ml)   | 162 $\pm$ 88   | 82 $\pm$ 29    | 136 $\pm$ 67      | 47 $\pm$ 11    | 0.38                     | 0.10                                  |
| Fractalkine (pg/ml)   | 161 $\pm$ 17   | 192 $\pm$ 27   | 233 $\pm$ 52      | 165 $\pm$ 28   | 0.39                     | 0.23                                  |
| LIF (pg/ml)           | 6 $\pm$ 1.6    | 6.8 $\pm$ 1.6  | 5.8 $\pm$ 1.7     | 7.5 $\pm$ 2.6  | 0.40                     | 0.63                                  |
| TGF $\alpha$ (pg/ml)  | 36 $\pm$ 29    | 105 $\pm$ 94   | 245 $\pm$ 237     | 13 $\pm$ 2.7   | 0.42                     | 0.50                                  |
| IL5 (pg/ml)           | 4.3 $\pm$ 1    | 6.9 $\pm$ 2.1  | 10 $\pm$ 5        | 5.2 $\pm$ 0.4  | 0.44                     | 0.57                                  |
| IL1RA (pg/ml)         | 23 $\pm$ 8.6   | 23 $\pm$ 5.9   | 32 $\pm$ 14       | 17 $\pm$ 3.4   | 0.45                     | 0.30                                  |
| TNF $\alpha$ (pg/ml)  | 41 $\pm$ 4.8   | 62 $\pm$ 17    | 59 $\pm$ 19       | 64 $\pm$ 27    | 0.46                     | 0.75                                  |

|                                 |                |                |                |                |      |       |
|---------------------------------|----------------|----------------|----------------|----------------|------|-------|
| SDF1 $\alpha$ + $\beta$ (ng/ml) | 1.8 $\pm$ 0.2  | 1.5 $\pm$ 0.3  | 1.5 $\pm$ 0.4  | 1.6 $\pm$ 0.4  | 0.48 | 0.87  |
| GRO $\alpha$ (pg/ml)            | 16 $\pm$ 5.9   | 10 $\pm$ 3.5   | 15 $\pm$ 7.6   | 6.8 $\pm$ 1.6  | 0.48 | 0.26  |
| sCD40L (pg/ml)                  | 643 $\pm$ 229  | 735 $\pm$ 152  | 762 $\pm$ 314  | 717 $\pm$ 172  | 0.49 | 0.75  |
| IL1 $\alpha$ (pg/ml)            | 273 $\pm$ 170  | 168 $\pm$ 91   | 279 $\pm$ 226  | 94 $\pm$ 42    | 0.50 | 0.48  |
| IL17A (pg/ml)                   | 36 $\pm$ 24    | 21 $\pm$ 12    | 37 $\pm$ 29    | 9.6 $\pm$ 1.6  | 0.52 | 0.44  |
| FLT3L (pg/ml)                   | 7.5 $\pm$ 1.3  | 10 $\pm$ 2.2   | 12 $\pm$ 4.8   | 9 $\pm$ 2.2    | 0.52 | 0.67  |
| IL16 (pg/ml)                    | 359 $\pm$ 163  | 383 $\pm$ 142  | 416 $\pm$ 364  | 366 $\pm$ 147  | 0.54 | 0.47  |
| TSLP (pg/ml)                    | 73 $\pm$ 70    | 28 $\pm$ 16    | 39 $\pm$ 35    | 21 $\pm$ 14    | 0.54 | 0.98  |
| IL18 (pg/ml)                    | 377 $\pm$ 101  | 382 $\pm$ 56   | 246 $\pm$ 66   | 472 $\pm$ 59   | 0.54 | 0.02* |
| VEGFA (pg/ml)                   | 7.5 $\pm$ 1.3  | 7.7 $\pm$ 1.8  | 10 $\pm$ 0.2   | 6 $\pm$ 2.9    | 0.55 | 0.11  |
| IL20 (pg/ml)                    | 233 $\pm$ 72.7 | 206 $\pm$ 73   | 210 $\pm$ 189  | 204 $\pm$ 75   | 0.55 | 0.35  |
| IL33 (pg/ml)                    | 87 $\pm$ 61    | 67 $\pm$ 23    | 110 $\pm$ 65   | 46 $\pm$ 13    | 0.55 | 0.50  |
| TPO (pg/ml)                     | 771 $\pm$ 646  | 309 $\pm$ 85   | 389 $\pm$ 188  | 256 $\pm$ 78   | 0.56 | 0.69  |
| IL23 (ng/ml)                    | 2.8 $\pm$ 2.3  | 1.5 $\pm$ 0.5  | 1.8 $\pm$ 1    | 1.3 $\pm$ 0.5  | 0.57 | 0.66  |
| IL12p70 (pg/ml)                 | 32 $\pm$ 23    | 11 $\pm$ 2.6   | 14 $\pm$ 5.4   | 9.3 $\pm$ 2.6  | 0.57 | 0.35  |
| MMP1 (ng/ml)                    | 0.9 $\pm$ 0.2  | 1.2 $\pm$ 0.3  | 0.5 $\pm$ 0.2  | 1.5 $\pm$ 0.3  | 0.57 | 0.06  |
| TRAIL (pg/ml)                   | 16 $\pm$ 2.5   | 21 $\pm$ 4.2   | 23 $\pm$ 6.5   | 20 $\pm$ 5.9   | 0.58 | 0.58  |
| TIMP4 (pg/ml)                   | 708 $\pm$ 90   | 774 $\pm$ 94   | 763 $\pm$ 195  | 779 $\pm$ 117  | 0.61 | 0.99  |
| MIG/CXCL9 (ng/ml)               | 1.4 $\pm$ 0.2  | 2.8 $\pm$ 1.6  | 1.4 $\pm$ 0.09 | 3.8 $\pm$ 2.6  | 0.61 | 0.72  |
| MMP12 (pg/ml)                   | 634 $\pm$ 49   | 599 $\pm$ 29   | 556 $\pm$ 16   | 618 $\pm$ 40   | 0.64 | 0.44  |
| IL17F (pg/ml)                   | 65 $\pm$ 38    | 93 $\pm$ 52    | 165 $\pm$ 113  | 35 $\pm$ 12    | 0.64 | 0.21  |
| IL17E/IL25 (ng/ml)              | 1 $\pm$ 0.2    | 1.5 $\pm$ 0.6  | 2.4 $\pm$ 1.4  | 0.9 $\pm$ 0.2  | 0.64 | 0.29  |
| Eotaxin3 (pg/ml)                | 10 $\pm$ 3.6   | 8 $\pm$ 1.7    | 7.7 $\pm$ 3.5  | 8.1 $\pm$ 2.1  | 0.66 | 0.67  |
| PDGFAA (ng/ml)                  | 1.1 $\pm$ 0.2  | 1.3 $\pm$ 0.4  | 1.1 $\pm$ 0.7  | 1.4 $\pm$ 0.5  | 0.69 | 0.53  |
| MMP13 (pg/ml)                   | 393 $\pm$ 76   | 394 $\pm$ 106  | 37 $\pm$       | 454 $\pm$ 103  | 0.71 | 0.01* |
| IL28A (pg/ml)                   | 931 $\pm$ 463  | 800 $\pm$ 318  | 897 $\pm$ 851  | 752 $\pm$ 310  | 0.71 | 0.35  |
| IL2 (pg/ml)                     | 12 $\pm$ 9     | 7.5 $\pm$ 4.4  | 15 $\pm$ 11    | 2.5 $\pm$ 0.5  | 0.72 | 0.17  |
| IL13 (pg/ml)                    | 90 $\pm$ 10    | 117 $\pm$ 26   | 154 $\pm$ 48   | 93 $\pm$ 28    | 0.73 | 0.27  |
| RANTES (ng/ml)                  | 6.6 $\pm$ 2.3  | 8.6 $\pm$ 2.6  | 6.6 $\pm$ 5.7  | 9.9 $\pm$ 2.4  | 0.75 | 0.35  |
| MMP9 (ng/ml)                    | 255 $\pm$ 59   | 249 $\pm$ 71   | 80 $\pm$ 25    | 321 $\pm$ 88   | 0.76 | 0.04* |
| PDGFAB/BB (ng/ml)               | 12.3 $\pm$ 2.1 | 15.9 $\pm$ 3.5 | 11.4 $\pm$ 7.1 | 18.9 $\pm$ 3.5 | 0.76 | 0.14  |
| ENA78 (pg/ml)                   | 80 $\pm$ 33    | 61 $\pm$ 13    | 48 $\pm$ 14    | 70 $\pm$ 20    | 0.76 | 0.45  |
| SCF (pg/ml)                     | 15 $\pm$ 5.5   | 19 $\pm$ 7.2   | 26 $\pm$ 15    | 15 $\pm$ 8.5   | 0.79 | 0.36  |
| MCP2 (pg/ml)                    | 14 $\pm$ 1.3   | 14 $\pm$ 1.2   | 16 $\pm$ 1.5   | 13 $\pm$ 1.7   | 0.80 | 0.27  |
| MCSF (pg/ml)                    | 139 $\pm$ 20   | 157 $\pm$ 28   | 144 $\pm$ 32   | 166 $\pm$ 43   | 0.80 | 0.82  |
| IFN $\alpha$ 2 (pg/ml)          | 191 $\pm$ 91   | 183 $\pm$ 67   | 263 $\pm$ 171  | 129 $\pm$ 14   | 0.80 | 0.68  |
| GCSF (pg/ml)                    | 46 $\pm$ 6.6   | 45 $\pm$ 7.1   | 51 $\pm$ 12    | 41 $\pm$ 9.2   | 0.81 | 0.47  |
| MCP3 (pg/ml)                    | 19 $\pm$ 2.1   | 25 $\pm$ 7.3   | 24 $\pm$ 8.1   | 26 $\pm$ 12    | 0.82 | 0.81  |
| IL9 (pg/ml)                     | 16 $\pm$ 2.2   | 19 $\pm$ 4.9   | 24 $\pm$ 13    | 15 $\pm$ 3     | 0.86 | 0.59  |
| IL10 (pg/ml)                    | 7.2 $\pm$ 1.3  | 6.7 $\pm$ 1    | 7.9 $\pm$ 1.3  | 5.9 $\pm$ 1.4  | 0.87 | 0.26  |
| 6CKine (pg/ml)                  | 307 $\pm$ 58   | 326 $\pm$ 50   | 335 $\pm$ 99   | 320 $\pm$ 61   | 0.87 | 0.92  |

|                       |         |         |         |         |      |      |
|-----------------------|---------|---------|---------|---------|------|------|
| IL22 (pg/ml)          | 82±8.2  | 102±31  | 92±27   | 109±51  | 0.91 | 0.89 |
| EGF (pg/ml)           | 42±7.9  | 44±10   | 59±17   | 30±6.7  | 0.93 | 0.21 |
| IL7 (pg/ml)           | 24±23   | 4.7±1.7 | 7.8±3.3 | 2.2±0.6 | 0.94 | 0.37 |
| MDC (ng/ml)           | 0.7±0.1 | 0.9±0.3 | 0.6±0.2 | 1.1±0.5 | 0.95 | 0.46 |
| IL3 (pg/ml)           | 1.3±0.2 | 1.6±0.3 | 1.4±0.6 | 1.7±0.5 | 0.95 | 0.80 |
| MIP1 $\alpha$ (pg/ml) | 51±2.4  | 63±17   | 86±42   | 47±7.2  | 0.95 | 0.42 |
| FGF2 (pg/ml)          | 233±93  | 205±49  | 286±93  | 151±49  | 0.96 | 0.20 |
| BCA1 (pg/ml)          | 351±157 | 261±58  | 278±81  | 249±87  | 0.98 | 0.83 |
| IL4 (pg/ml)           | 1.6±0.2 | 2.8±1   | 4.5±2.2 | 1.7±0.7 | 1.00 | 0.31 |

---

---



**Table S5.**

**Group characteristics for human placental analyses (Control n=17, All PreE n=21, Preterm PreE=13, Term PreE n=8);** Data represent mean  $\pm$  SEM. \* $P < 0.05$  vs. control, one-way ANOVA with Bonferroni multiple comparisons procedure or Chi-square test. PreE, preeclampsia.

|                                             | Control        | All PreE        | Preterm PreE    | Term PreE      | <i>P</i> value |
|---------------------------------------------|----------------|-----------------|-----------------|----------------|----------------|
| Gestational age at delivery (weeks)         | 38.5 $\pm$ 0.3 | 35.2 $\pm$ 0.5* | 33.6 $\pm$ 0.4* | 37.7 $\pm$ 0.3 | <0.0001        |
| % C section                                 | 47             | 81              | 77              | 88             | 0.16           |
| Maternal age (years)                        | 30.2 $\pm$ 1.1 | 32.8 $\pm$ 1.2  | 31.5 $\pm$ 1.6  | 34.8 $\pm$ 1.7 | 0.20           |
| Maternal BMI                                | 29.7 $\pm$ 1.6 | 34.4 $\pm$ 1.7  | 35.4 $\pm$ 2.1  | 33.0 $\pm$ 3.0 | 0.22           |
| Peak systolic blood pressure (mmHg)         | 125 $\pm$ 2    | 183 $\pm$ 5*    | 185 $\pm$ 7*    | 180 $\pm$ 9*   | <0.0001        |
| Peak diastolic blood pressure (mmHg)        | 80 $\pm$ 2     | 108 $\pm$ 3*    | 109 $\pm$ 3*    | 105 $\pm$ 5*   | <0.0001        |
| Plasma creatine (mg/dL)                     | 0.6 $\pm$ 0.1  | 0.6 $\pm$ 0.03  | 0.5 $\pm$ 0.03  | 0.7 $\pm$ 0.06 | 0.22           |
| Lowest platelet count (x10 <sup>9</sup> /L) | 209 $\pm$ 11   | 208 $\pm$ 16    | 207 $\pm$ 24    | 209 $\pm$ 18   | 0.99           |
| AST (U/L)                                   | 17.8 $\pm$ 1.5 | 55.2 $\pm$ 25   | 59 $\pm$ 38     | 47 $\pm$ 18    | 0.90           |
| ALT (U/L)                                   | 10.4 $\pm$ 0.8 | 48.7 $\pm$ 21   | 48 $\pm$ 31     | 50 $\pm$ 26    | 0.86           |

**Table S6.**

**Group characteristics for human plasma analyses (Control n=10, All PreE n=10, “Non-Severe” PreE=4, Severe PreE n=6);** Data represent mean  $\pm$  SEM. \* $P < 0.05$  vs. control, one-way ANOVA with Bonferroni multiple comparisons procedure or Chi-square test. PreE, Preeclampsia.

|                                             | <b>Control</b> | <b>All PreE</b> | <b>“Non-Severe”<br/>PreE</b> | <b>Severe<br/>PreE</b> | <b>P value</b> |
|---------------------------------------------|----------------|-----------------|------------------------------|------------------------|----------------|
| Gestational age at delivery (weeks)         | 38.8 $\pm$ 0.3 | 35.5 $\pm$ 1.0* | 36.3 $\pm$ 0.6               | 35.0 $\pm$ 1.6*        | 0.02           |
| % C section                                 | 50%            | 30%             | 25%                          | 33%                    | 0.75           |
| Maternal age (years)                        | 29.1 $\pm$ 1.4 | 29.1 $\pm$ 1.7  | 29.5 $\pm$ 2.3               | 28.8 $\pm$ 2.6         | 0.99           |
| Maternal BMI                                | 29.1 $\pm$ 2.1 | 33.8 $\pm$ 2.7  | 38.6 $\pm$ 3.2               | 30.7 $\pm$ 3.5         | 0.11           |
| Peak systolic blood pressure (mmHg)         | 137 $\pm$ 5    | 181 $\pm$ 7*    | 169 $\pm$ 10*                | 189 $\pm$ 8*           | <0.0001        |
| Peak diastolic blood pressure (mmHg)        | 88 $\pm$ 4     | 112 $\pm$ 4*    | 103 $\pm$ 5                  | 119 $\pm$ 3*           | <0.0001        |
| Plasma creatine (mg/dL)                     | 0.6 $\pm$ 0.1  | 1.0 $\pm$ 0.2   | 1.1 $\pm$ 0.5                | 0.9 $\pm$ 0.2          | 0.58           |
| Lowest platelet count (x10 <sup>9</sup> /L) | 220 $\pm$ 14   | 194 $\pm$ 16    | 184 $\pm$ 20                 | 201 $\pm$ 25           | 0.56           |
| AST (U/L)                                   | 21.4 $\pm$ 3.7 | 17.8 $\pm$ 1.7  | 16.5 $\pm$ 1.7               | 18.7 $\pm$ 2.7         | 0.65           |
| ALT (U/L)                                   | 16.0 $\pm$ 2.7 | 14.0 $\pm$ 1.8  | 10.3 $\pm$ 2.0               | 16.5 $\pm$ 2.3         | 0.34           |

**Table S7.**

**Output from bulk RNA-sequencing of *hM3Dq<sup>F/F</sup> dam x Gcm1-Cre<sup>+/-</sup> sire placentas (n=6 per group, GD 14.5)***; Seq, sequence. GC, guanine and cystine. Dupl, duplication.

| Alias               | Seq Length R1/R2 | GC (%) R1/R2 | Dupl (%) R1/R2 | Total Reads | Total Read Pairs | Mapped Read Pairs | Mapped Read Pairs (Junction) | Gene Counts | Exon Counts |
|---------------------|------------------|--------------|----------------|-------------|------------------|-------------------|------------------------------|-------------|-------------|
| Saline Cre-rep1     | 35-101           | 49           | 67/63          | 87,638,186  | 43,819,093       | 41,974,798        | 22,442,337                   | 36,114,573  | 112,272,157 |
| Saline Cre-rep2     | 35-101           | 49           | 68/64          | 90,452,812  | 45,226,406       | 43,994,392        | 23,114,472                   | 37,605,219  | 121,998,114 |
| Saline Cre-rep3     | 35-101           | 49           | 67/63          | 88,368,902  | 44,184,451       | 42,743,206        | 22,734,828                   | 36,921,120  | 122,267,848 |
| Saline Cre-rep4     | 35-101           | 49           | 64/62          | 70,243,630  | 35,121,815       | 34,217,114        | 18,633,457                   | 29,546,183  | 95,748,048  |
| Saline Cre-rep5     | 35-101           | 49           | 63/60          | 69,935,484  | 34,967,742       | 33,764,744        | 18,192,487                   | 29,139,637  | 93,650,569  |
| Saline Cre-rep6     | 35-101           | 49           | 62/59          | 67,581,876  | 33,790,938       | 32,870,475        | 17,384,342                   | 28,010,106  | 91,132,626  |
| CNO Cre-rep1        | 35-101           | 48/49        | 66/63          | 61,513,588  | 30,756,794       | 30,020,151        | 14,269,222                   | 25,774,173  | 80,960,644  |
| CNO Cre-rep2        | 35-101           | 49           | 65/61          | 71,451,946  | 35,725,973       | 34,493,138        | 18,285,867                   | 29,941,725  | 96,152,912  |
| CNO Cre-rep3        | 35-101           | 49           | 67/59          | 84,846,794  | 42,423,397       | 37,663,204        | 19,627,648                   | 32,422,859  | 102,816,499 |
| CNO Cre-rep4        | 35-101           | 49           | 66/63          | 84,847,524  | 42,423,762       | 41,245,979        | 22,553,785                   | 35,723,300  | 117,801,295 |
| CNO Cre-rep5        | 35-101           | 49           | 74/71          | 119,436,068 | 59,718,034       | 57,956,583        | 30,953,633                   | 51,138,547  | 164,571,296 |
| CNO Cre-rep6        | 35-101           | 49           | 68/65          | 85,132,310  | 42,566,155       | 41,057,787        | 22,865,916                   | 35,724,483  | 113,677,027 |
| CNO Cre+ rep1       | 35-101           | 48/49        | 67/63          | 68,283,476  | 34,141,738       | 32,944,901        | 16,650,781                   | 28,603,016  | 92,073,254  |
| CNO Cre+ rep2       | 35-101           | 48/49        | 68/65          | 99,058,938  | 49,529,469       | 48,267,349        | 26,054,168                   | 42,117,438  | 137,398,378 |
| CNO Cre+ rep3       | 35-101           | 49/50        | 65/62          | 86,620,780  | 43,310,390       | 41,831,187        | 22,274,345                   | 36,058,066  | 117,081,731 |
| CNO Cre+ rep4       | 35-101           | 49           | 65/62          | 74,323,926  | 37,161,963       | 36,139,306        | 19,735,665                   | 31,324,080  | 101,610,178 |
| CNO Cre+ rep5       | 35-101           | 49           | 70/67          | 104,004,496 | 52,002,248       | 50,628,243        | 27,883,522                   | 44,305,274  | 145,035,566 |
| CNO Cre+ rep6       | 35-101           | 49/50        | 66/61          | 75,679,152  | 37,839,576       | 36,172,091        | 19,342,315                   | 31,286,573  | 101,188,637 |
| CNO+MitoQ Cre+ rep1 | 35-101           | 49           | 66/63          | 71,566,736  | 35,783,368       | 34,820,675        | 19,488,162                   | 30,386,501  | 98,857,519  |
| CNO+MitoQ Cre+ rep2 | 35-101           | 49/50        | 64/61          | 68,279,128  | 34,139,564       | 33,041,796        | 17,340,770                   | 28,424,137  | 92,740,972  |
| CNO+MitoQ Cre+ rep3 | 35-101           | 49           | 67/63          | 86,721,048  | 43,360,524       | 42,204,749        | 22,449,771                   | 36,285,408  | 113,285,493 |
| CNO+MitoQ Cre+ rep4 | 35-101           | 49           | 65/62          | 64,509,404  | 32,254,702       | 31,348,040        | 16,539,275                   | 27,112,272  | 87,626,226  |
| CNO+MitoQ Cre+ rep5 | 35-101           | 49           | 68/65          | 74,821,202  | 37,410,601       | 36,311,340        | 19,992,334                   | 32,278,701  | 106,355,824 |
| CNO+MitoQ Cre+ rep6 | 35-101           | 49           | 67/64          | 77,040,634  | 38,520,317       | 37,339,523        | 20,129,837                   | 32,556,419  | 104,454,720 |
